# Supplementary material for: Development of potent cholinesterase inhibitors based on a marine pharmacophore
Source: Royal Society of Chemistry journal article supplement (doi:10.1039/d2ob01064j), 2022-01-01

## Supporting information

# Development of potent cholinesterase inhibitors based on a marine pharmacophore

*Vijayaragavan Elumalai<sup>1</sup>, Tomaž Trobec<sup>2</sup>, Maja Grundner<sup>3</sup>, Christophe Labriere,<sup>1</sup> Robert Frangež<sup>2</sup>, Kristina Sepčič<sup>3</sup>, Jørn H. Hansen<sup>1</sup> and Johan Svenson<sup>4,\*</sup>*

<sup>1</sup>Department of Chemistry, Chemical Synthesis and Analysis Group, UiT The Arctic University of Norway, N-9037, Tromsø, Norway.

<sup>2</sup>Institute of Preclinical Sciences, Veterinary Faculty, University of Ljubljana, 1000 Ljubljana, Slovenia

<sup>3</sup>Department of Biology, Biotechnical Faculty, University of Ljubljana, 1000 Ljubljana, Slovenia

<sup>4</sup>Cawthron Institute, 98 Halifax Street East, Nelson 7010, New Zealand

\*Correspondence and requests for materials should be addressed to J.S. (Ph: +64 27 272 1876, email: [Johan.svenson@cawthron.co.nz](mailto:Johan.svenson@cawthron.co.nz)); orchid: 0000-0002-4729-9359

**List of Contents:**

- Figure S1.**  $^1\text{H}$ -NMR and  $^{13}\text{C}$  -NMR spectrum of **3** in DMSO
- Figure S2.**  $^1\text{H}$ -NMR and  $^{13}\text{C}$  -NMR spectrum of **4** in Methanol- $d_4$
- Figure S3.**  $^1\text{H}$ -NMR and  $^{13}\text{C}$  -NMR spectrum of **6d** in  $\text{CDCl}_3$
- Figure S4.**  $^1\text{H}$ -NMR and  $^{13}\text{C}$  -NMR spectrum of **7** in  $\text{CDCl}_3$
- Figure S5.**  $^1\text{H}$ -NMR and  $^{13}\text{C}$  -NMR spectrum of **8a** in Methanol- $d_4$
- Figure S6.** COSY and HSQC spectrum of **8a** in Methanol- $d_4$
- Figure S7.** HMBC spectrum of **8a** in Methanol- $d_4$
- Figure S8.**  $^1\text{H}$ -NMR and  $^{13}\text{C}$  -NMR spectrum of **8b** in Methanol- $d_4$
- Figure S9.**  $^1\text{H}$ -NMR and  $^{13}\text{C}$  -NMR spectrum of **8c** in Methanol- $d_4$
- Figure S10.**  $^1\text{H}$ -NMR and  $^{13}\text{C}$  -NMR spectrum of **8d** in Methanol- $d_4$
- Figure S11.**  $^1\text{H}$ -NMR and  $^{13}\text{C}$  -NMR spectrum of **8e** in Methanol- $d_4$
- Figure S12.**  $^1\text{H}$ -NMR and  $^{13}\text{C}$  -NMR spectrum of **9a intermediate** in Methanol- $d_4$
- Figure S13.**  $^1\text{H}$ -NMR and  $^{13}\text{C}$  -NMR spectrum of **9a** in Methanol- $d_4$
- Figure S14.**  $^1\text{H}$ -NMR and  $^{13}\text{C}$  -NMR spectrum of **9b intermediate** in Methanol- $d_4$
- Figure S15.**  $^1\text{H}$ -NMR and  $^{13}\text{C}$  -NMR spectrum of **9b** in Methanol- $d_4$
- Figure S16.**  $^1\text{H}$ -NMR and  $^{13}\text{C}$  -NMR spectrum of **9c intermediate** in Methanol- $d_4$
- Figure S17.**  $^1\text{H}$ -NMR and  $^{13}\text{C}$  -NMR spectrum of **9c** in Methanol- $d_4$
- Figure S18.** COSY and HSQC spectrum of **9c** in Methanol- $d_4$
- Figure S19.** HMBC spectrum of **9c** in Methanol- $d_4$
- Figure S20.**  $^1\text{H}$ -NMR spectrum of **9d intermediate** in Methanol- $d_4$
- Figure S21.**  $^1\text{H}$ -NMR and  $^{13}\text{C}$  -NMR spectrum of **9d** in Methanol- $d_4$
- Figure S22.**  $^1\text{H}$ -NMR and  $^{13}\text{C}$  -NMR spectrum of **9e** in Methanol- $d_4$
- Figure S23.**  $^1\text{H}$ -NMR and  $^{13}\text{C}$  -NMR spectrum of **10a** in Methanol- $d_4$
- Figure S24.** COSY and HSQC spectrum of **10a** in Methanol- $d_4$
- Figure S25.** HMBC spectrum of **10a** in Methanol- $d_4$
- Figure S26.**  $^1\text{H}$ -NMR and  $^{13}\text{C}$  -NMR spectrum of **10b intermediate** in Methanol- $d_4$
- Figure S27.**  $^1\text{H}$ -NMR and  $^{13}\text{C}$  -NMR spectrum of **10b** in Methanol- $d_4$
- Figure S28.**  $^1\text{H}$ -NMR and  $^{13}\text{C}$  -NMR spectrum of **10c intermediate** in Methanol- $d_4$
- Figure S29.**  $^1\text{H}$ -NMR and  $^{13}\text{C}$  -NMR spectrum of **10c** in Methanol- $d_4$
- Figure S30.**  $^1\text{H}$ -NMR and  $^{13}\text{C}$  -NMR spectrum of **10d intermediate** in Methanol- $d_4$
- Figure S31.**  $^1\text{H}$ -NMR and  $^{13}\text{C}$  -NMR spectrum of **10d** in Methanol- $d_4$

**Figure S1.**  $^1\text{H}$ -NMR and  $^{13}\text{C}$ -NMR spectrum of **3** in DMSO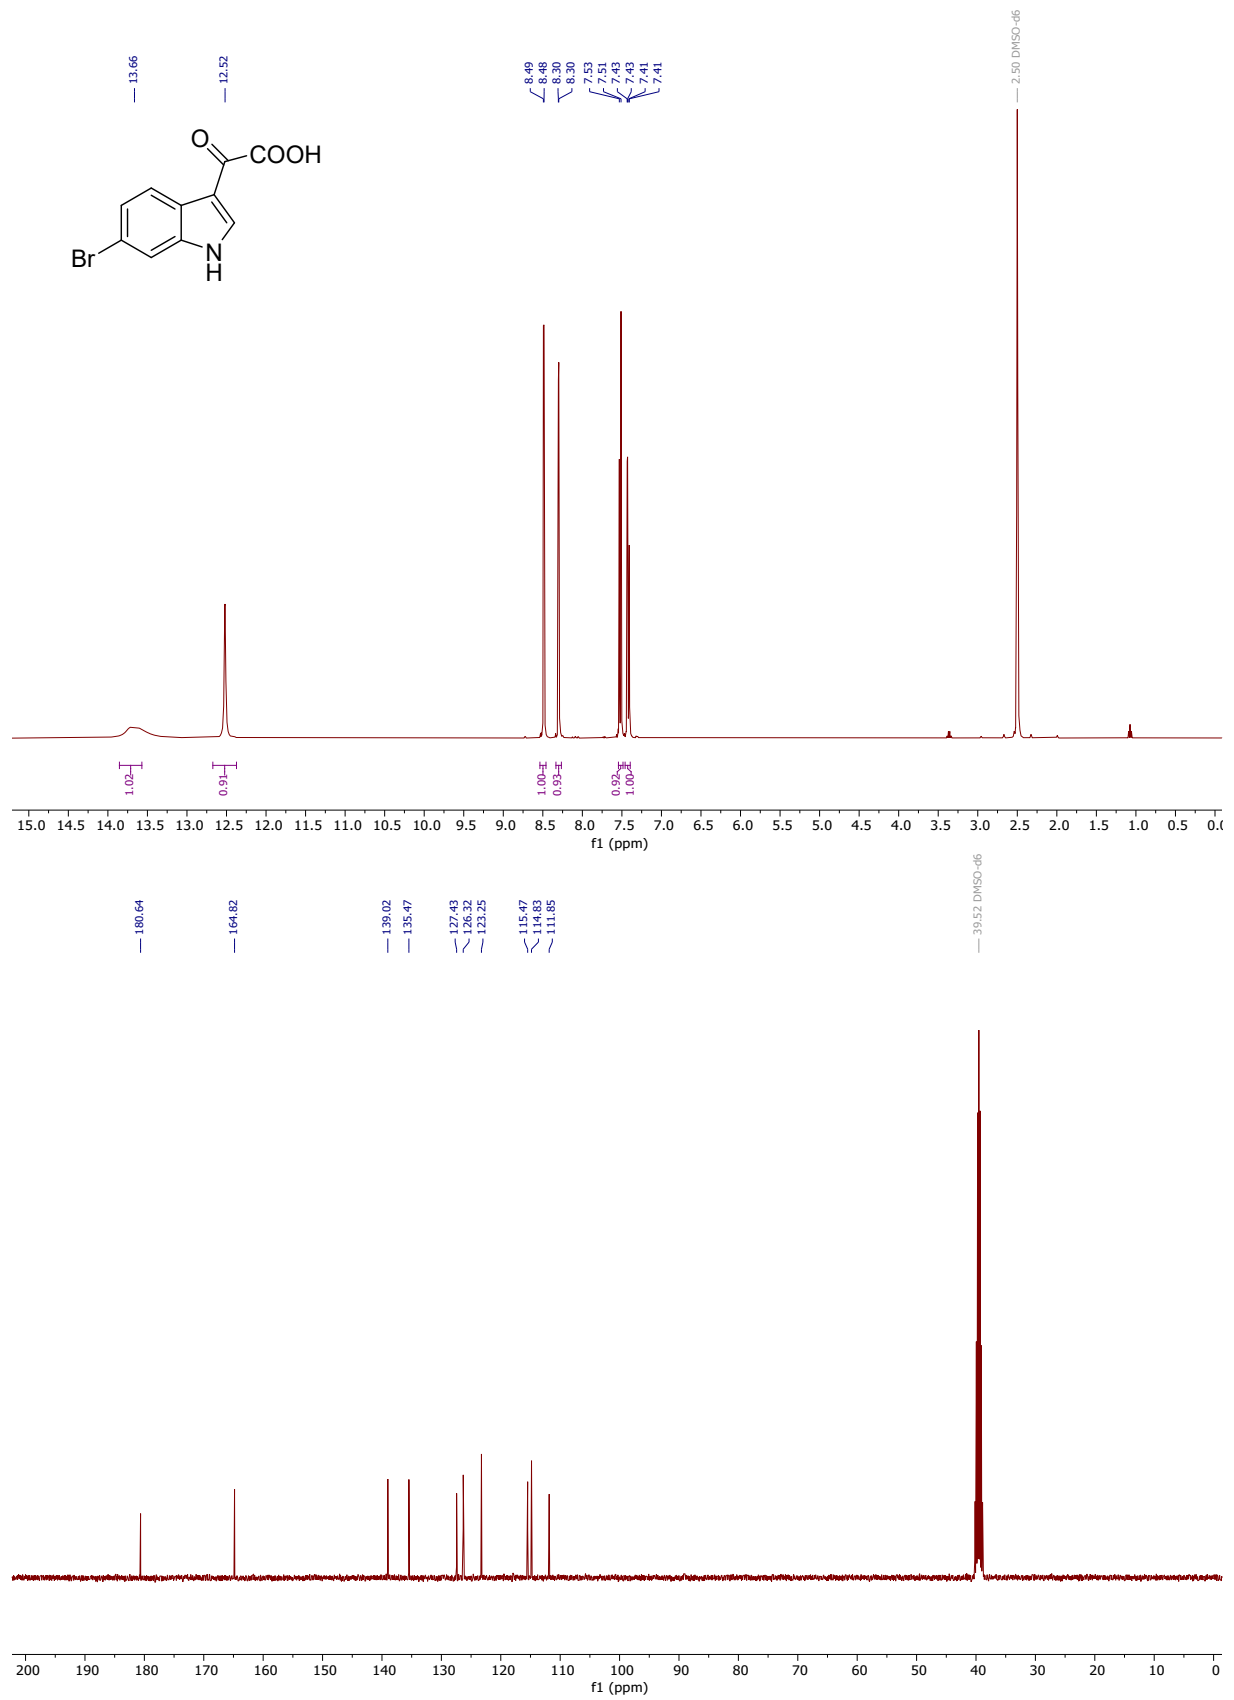

**Figure S2.**  $^1\text{H}$ -NMR and  $^{13}\text{C}$ -NMR spectrum of **4** in Methanol- $d_4$ 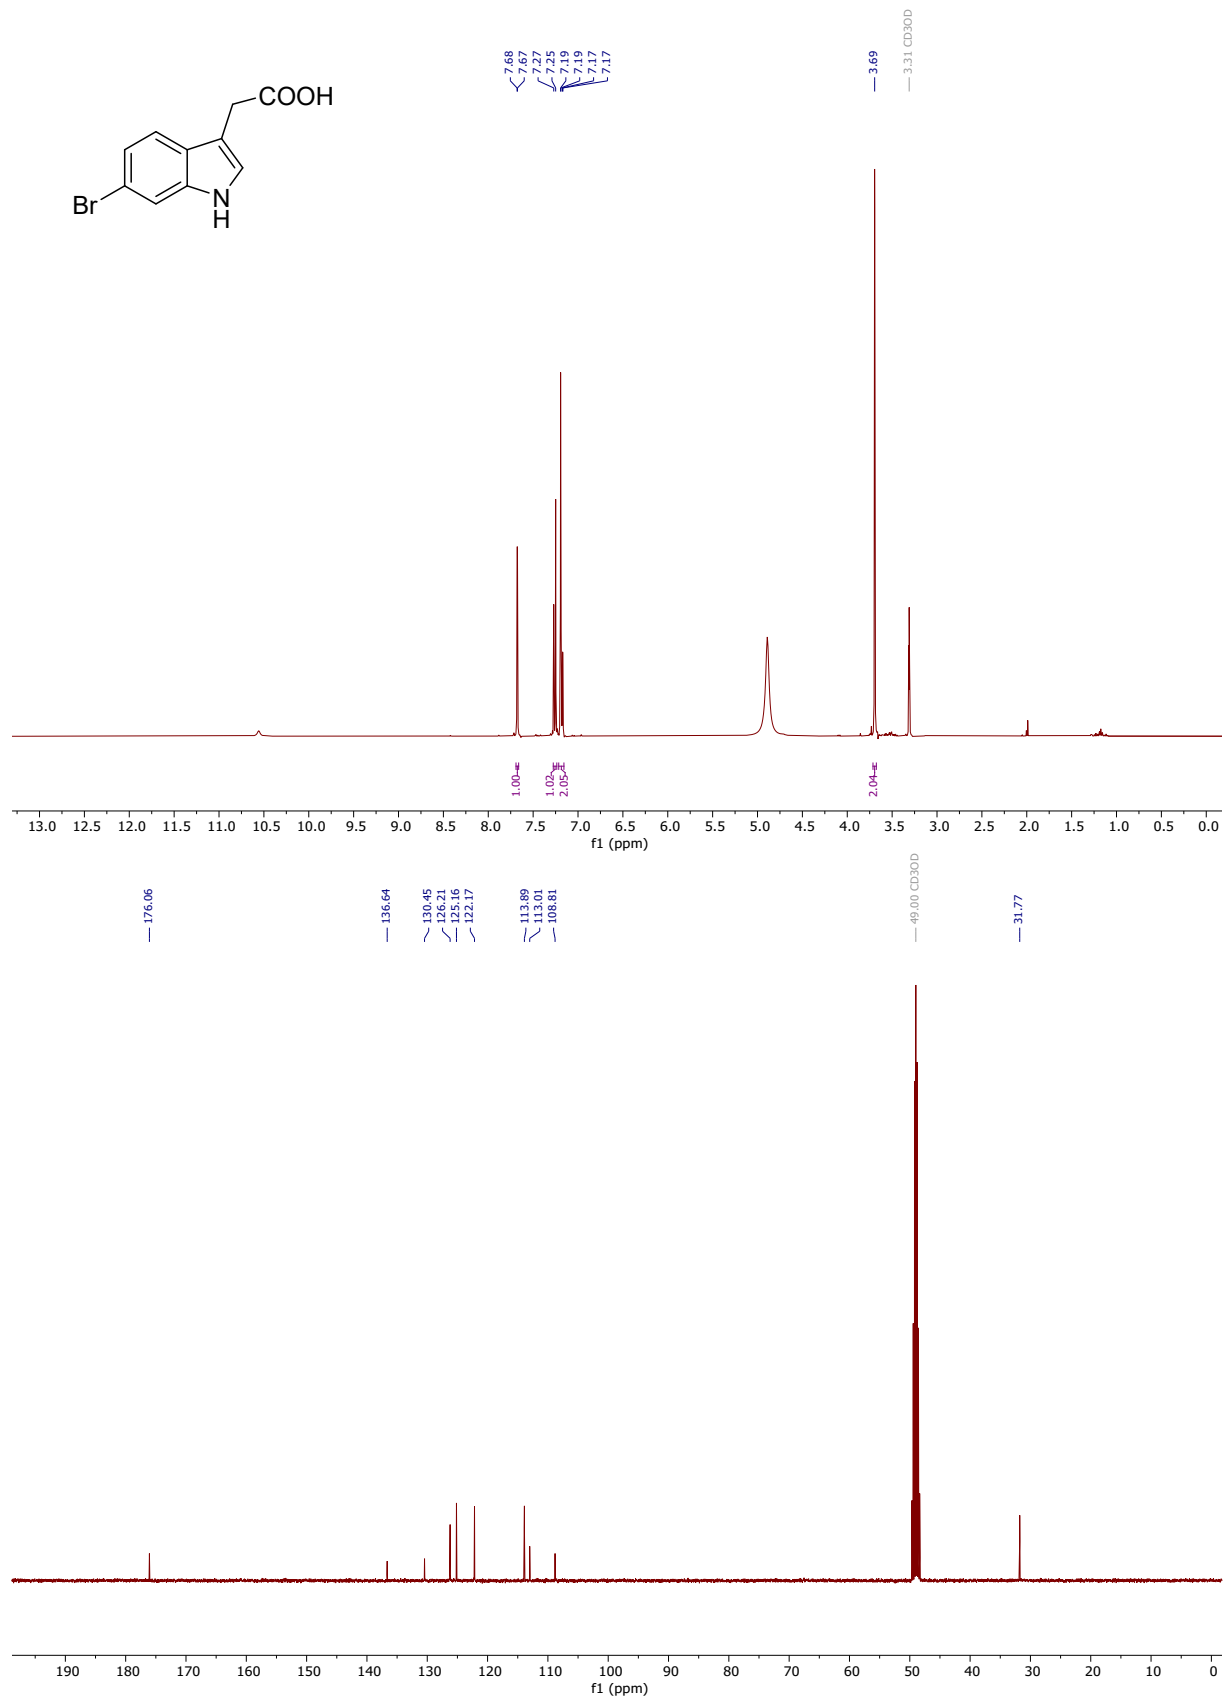

**Figure S3.**  $^1\text{H}$ -NMR and  $^{13}\text{C}$ -NMR spectrum of **6d** in  $\text{CDCl}_3$ 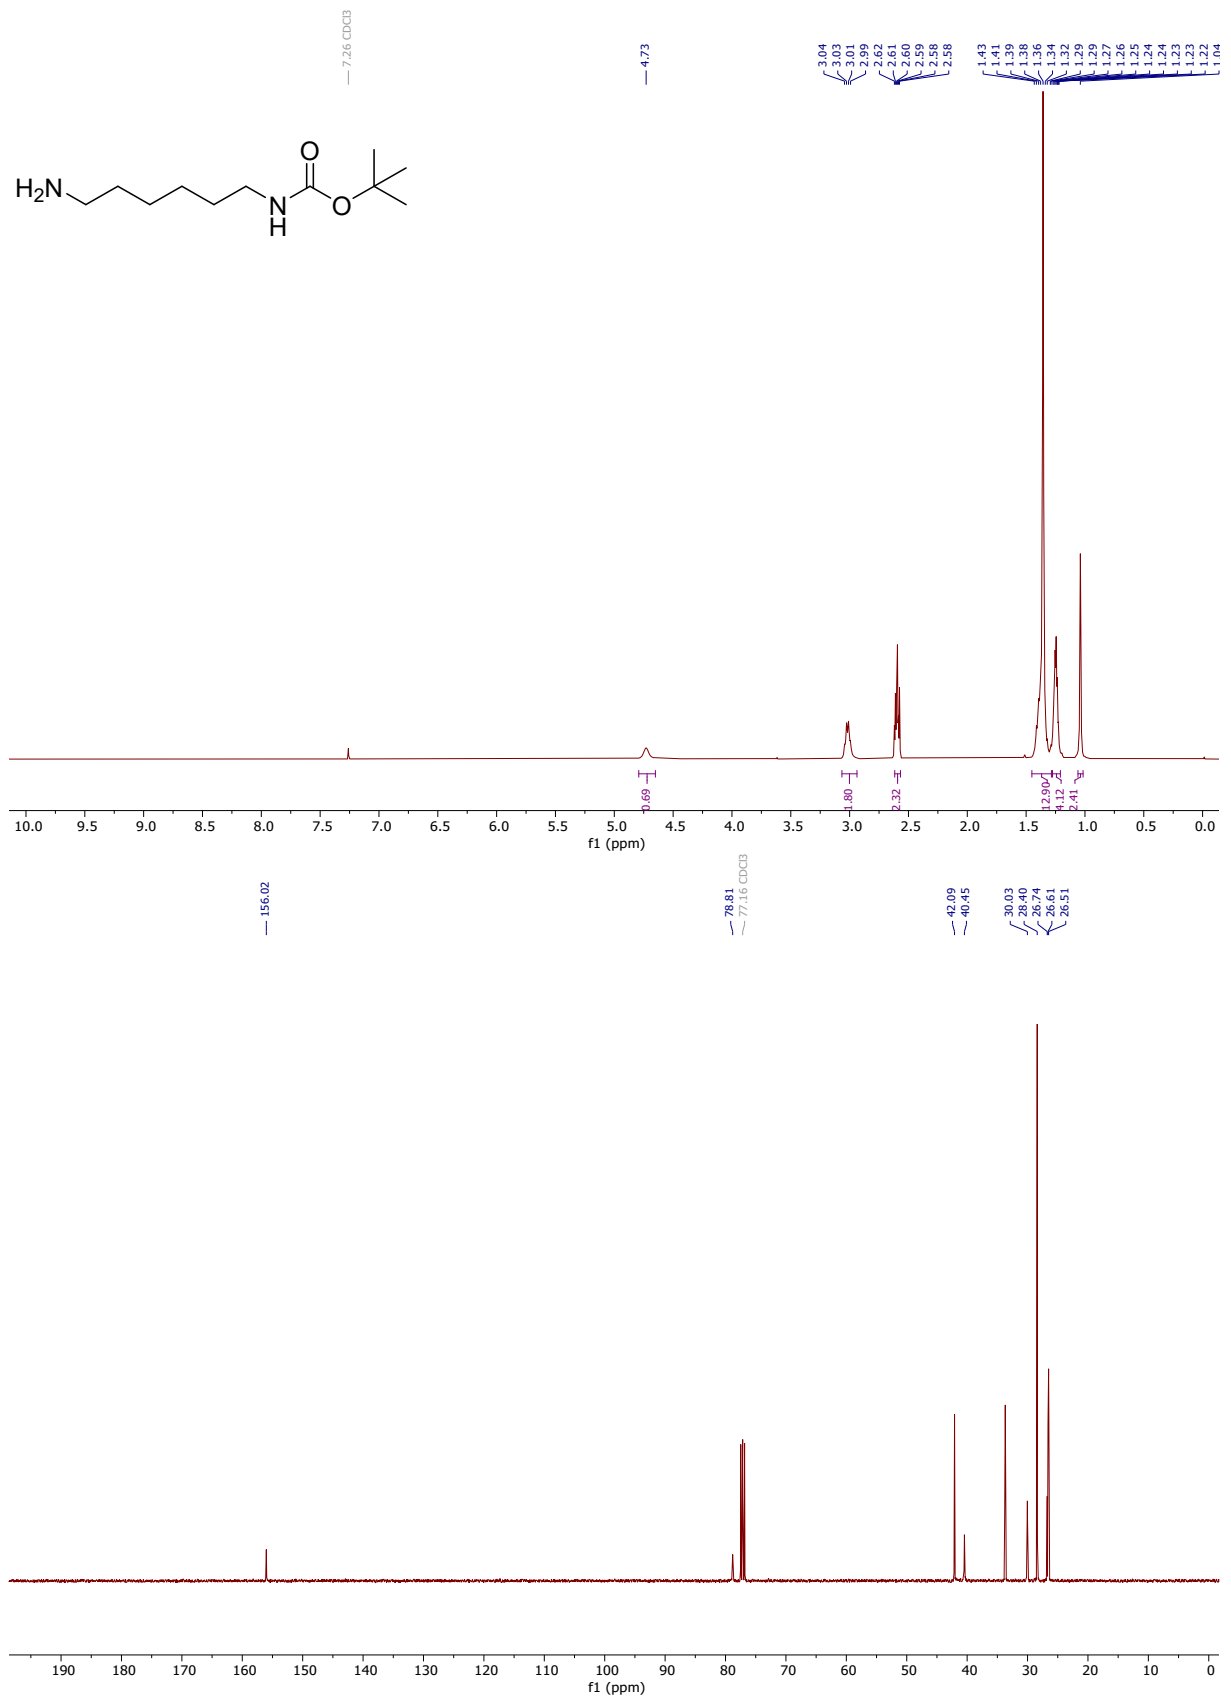

Figure S4.  $^1\text{H}$ -NMR and  $^{13}\text{C}$ -NMR spectrum of **7** in  $\text{CDCl}_3$ 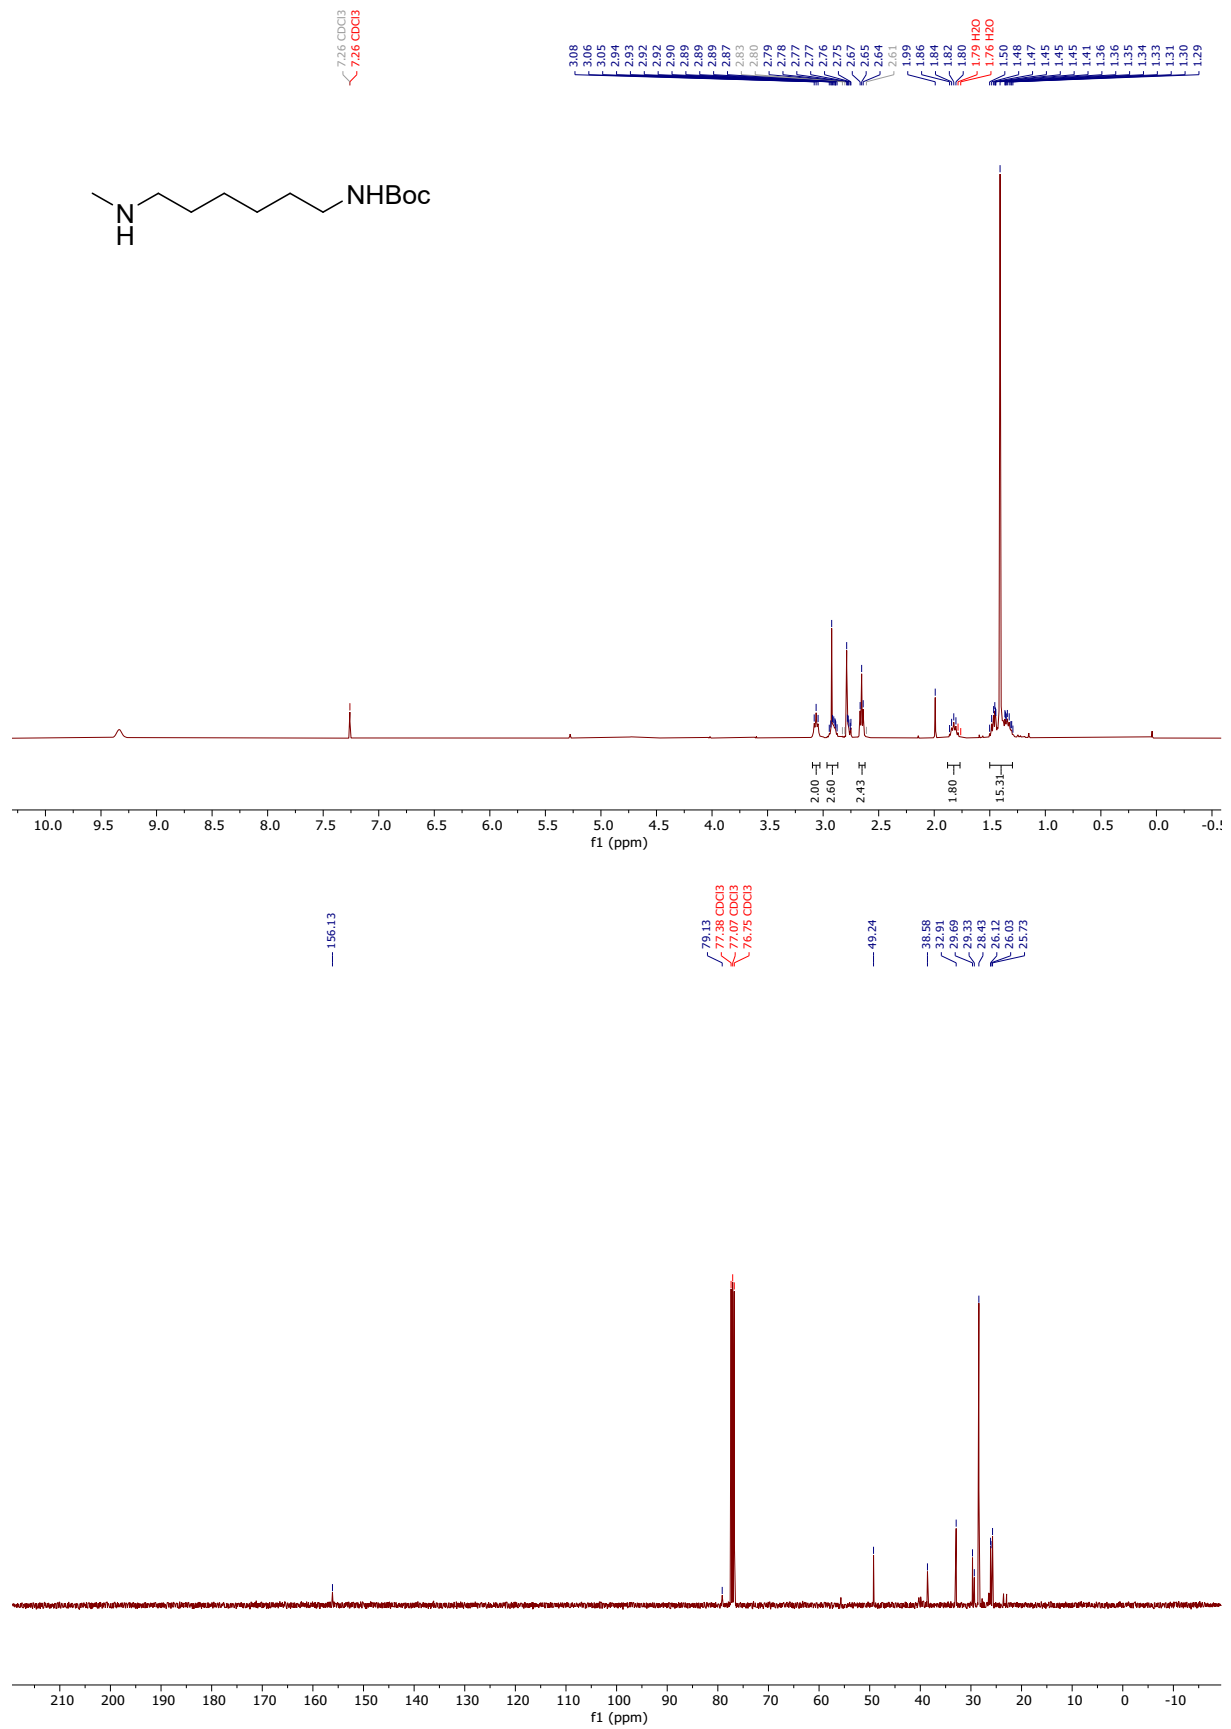

**Figure S5.**  $^1\text{H}$ -NMR and  $^{13}\text{C}$ -NMR spectrum of **8a** in Methanol- $d_4$ 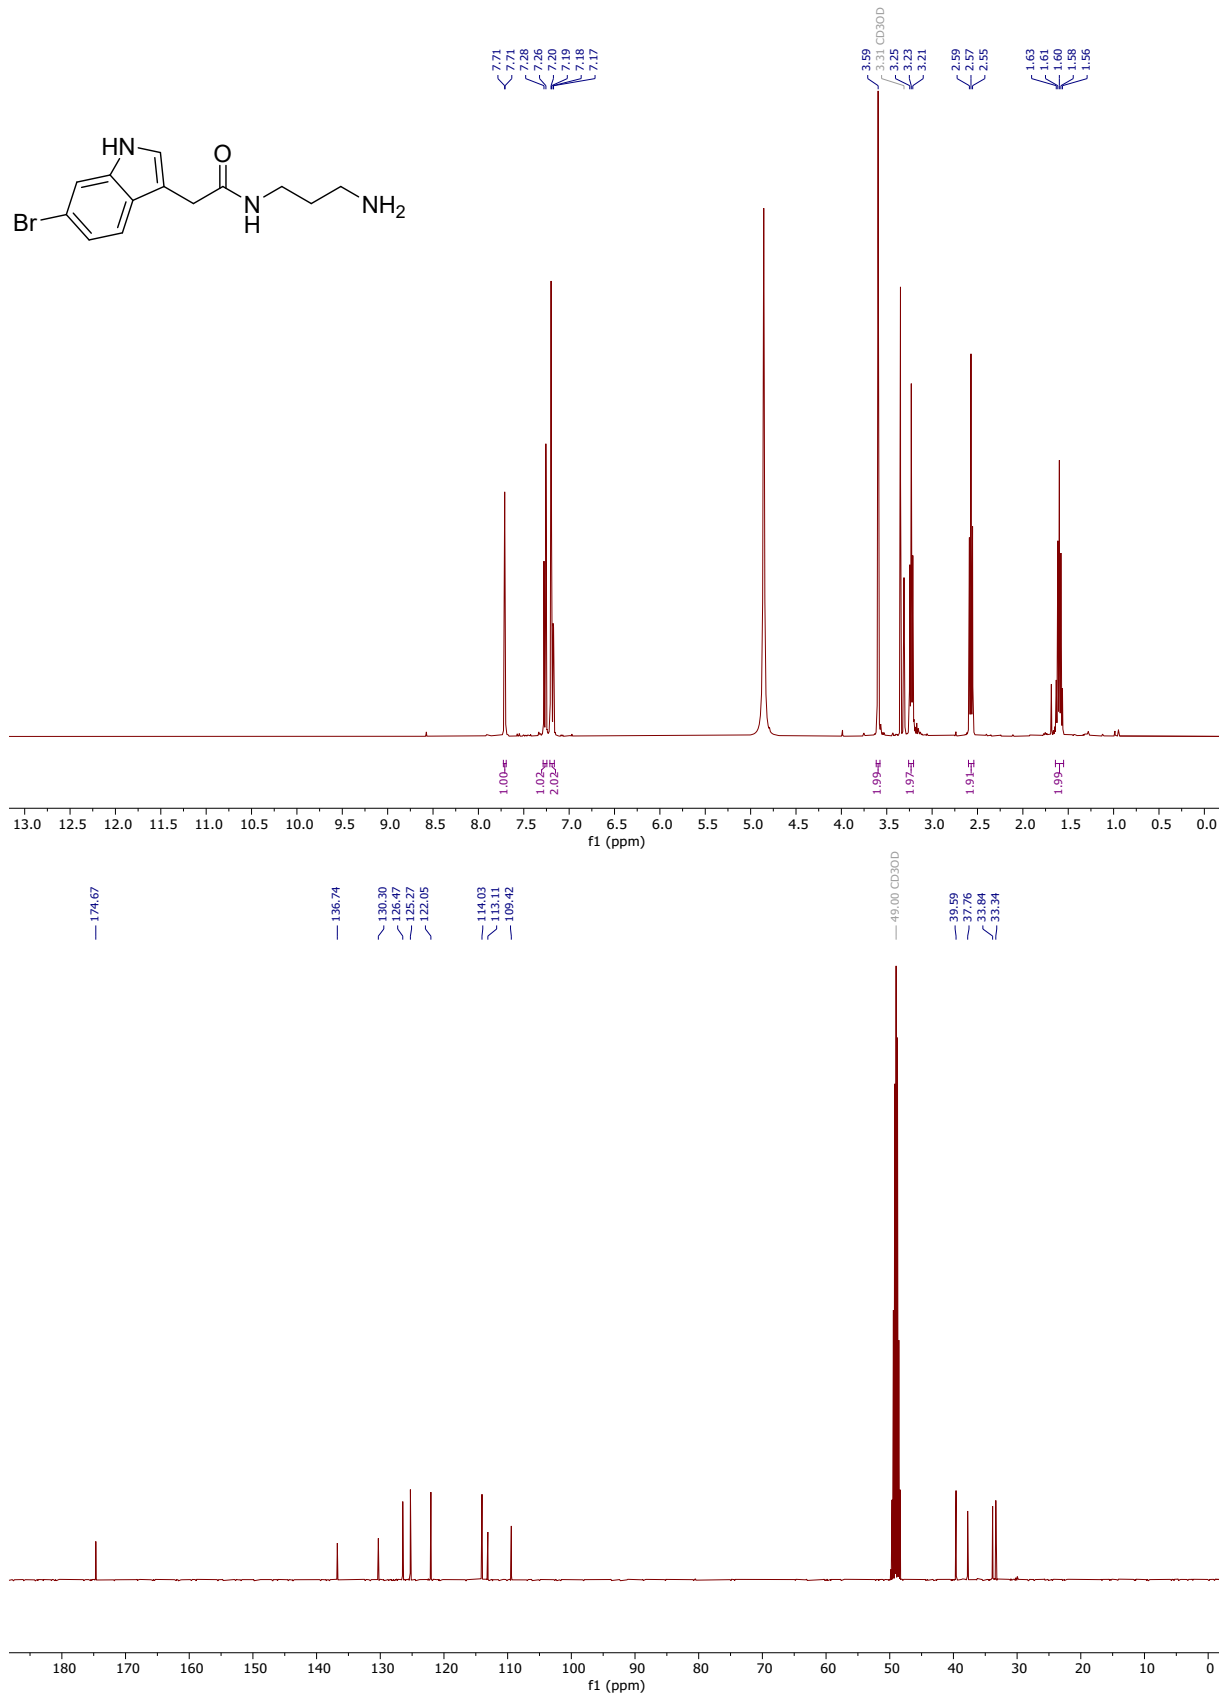

**Figure S6.** COSY and HSQC spectrum of **8a** in Methanol- $d_4$ 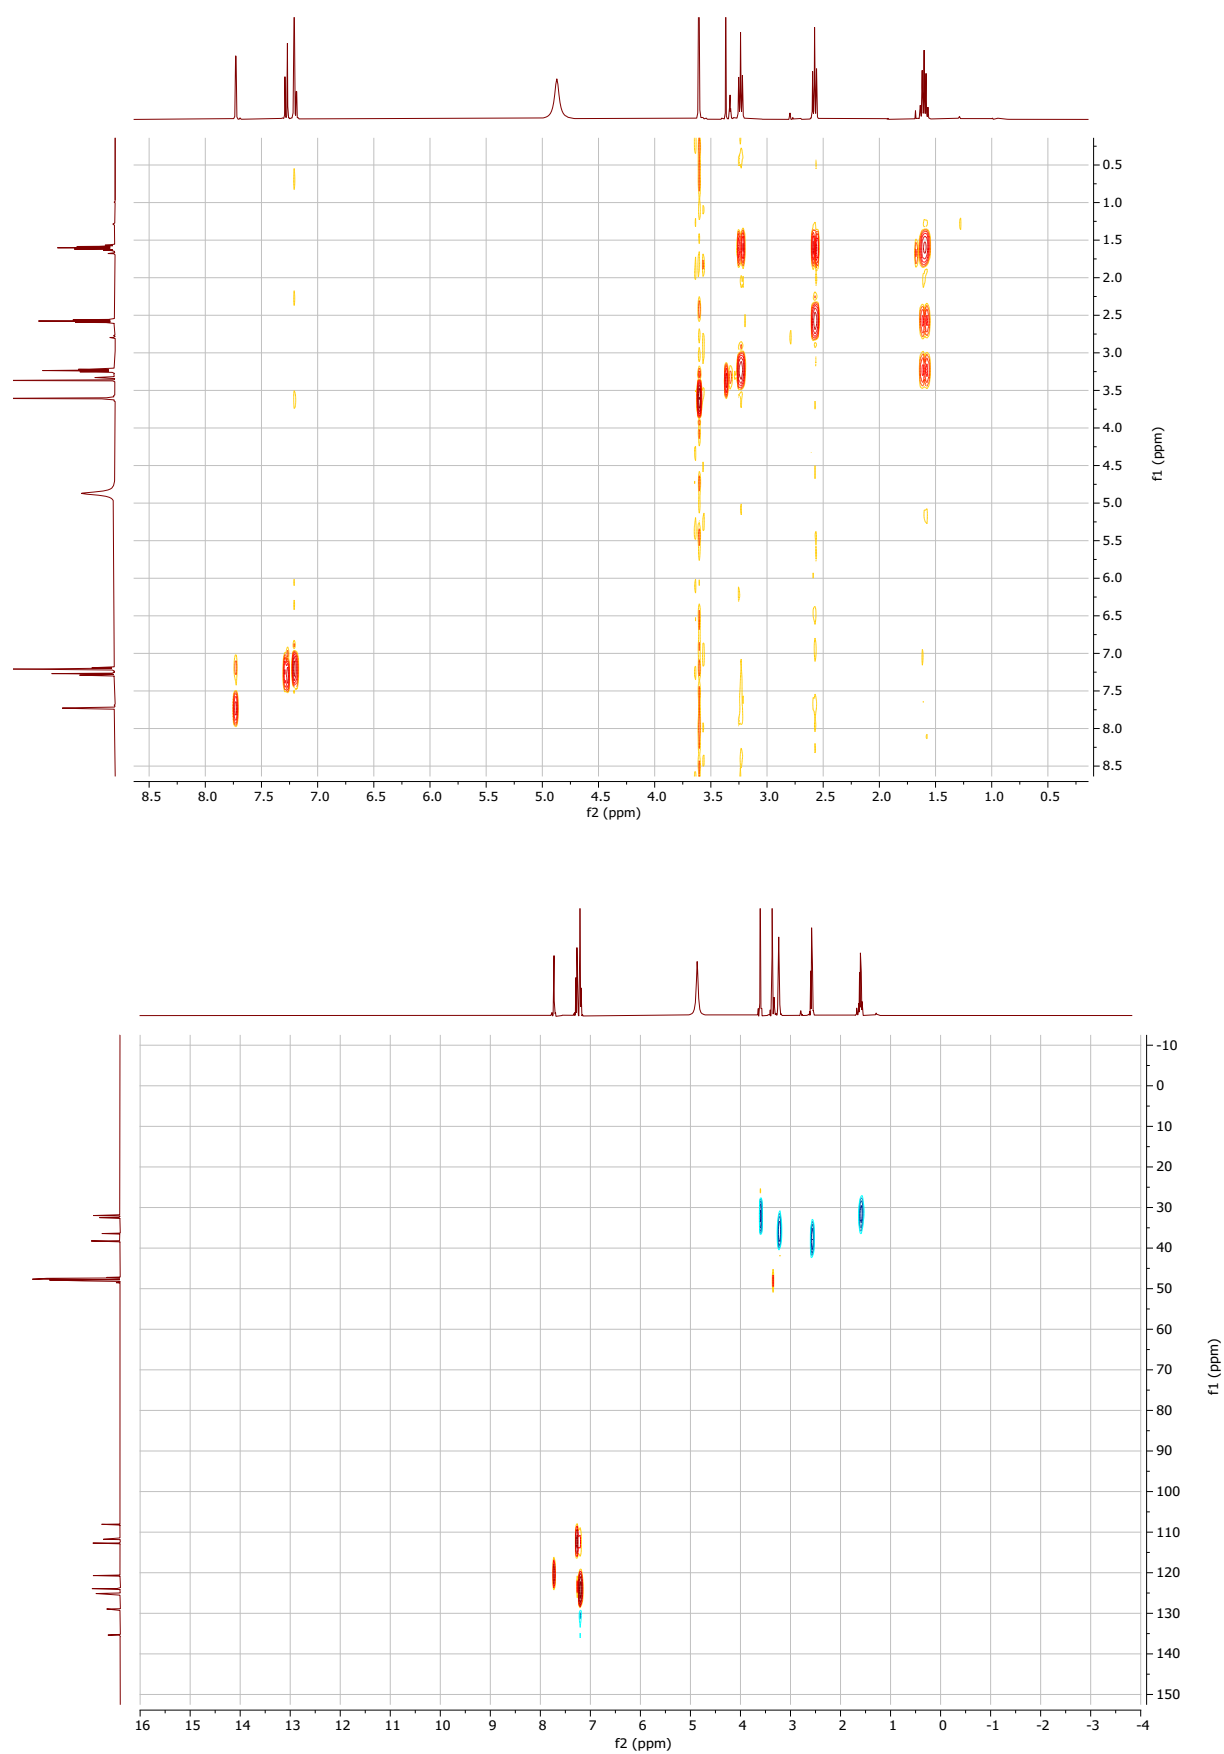



**Figure S7.** HMBC spectrum of **8a** in Methanol- $d_4$ 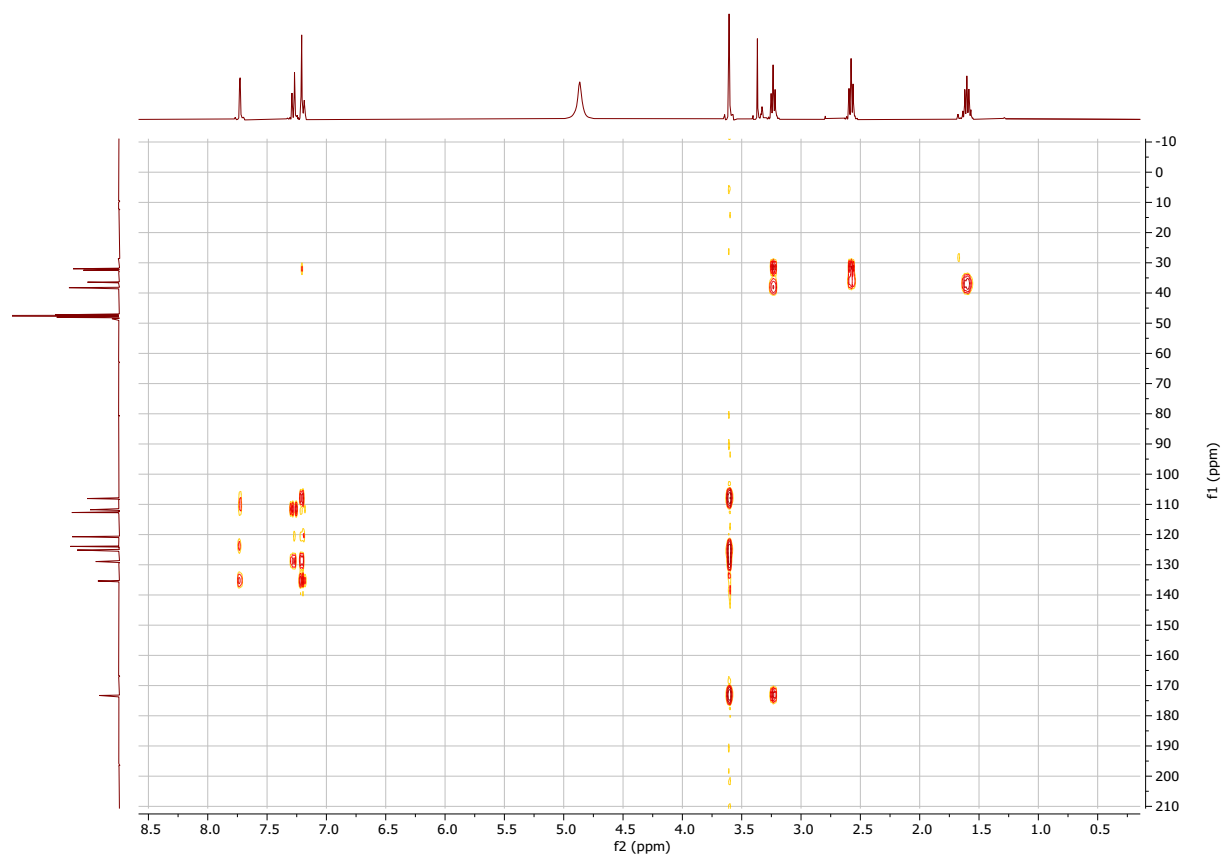

**Figure S8.**  $^1\text{H-NMR}$  and  $^{13}\text{C-NMR}$  spectrum of **8b** in Methanol- $d_4$ 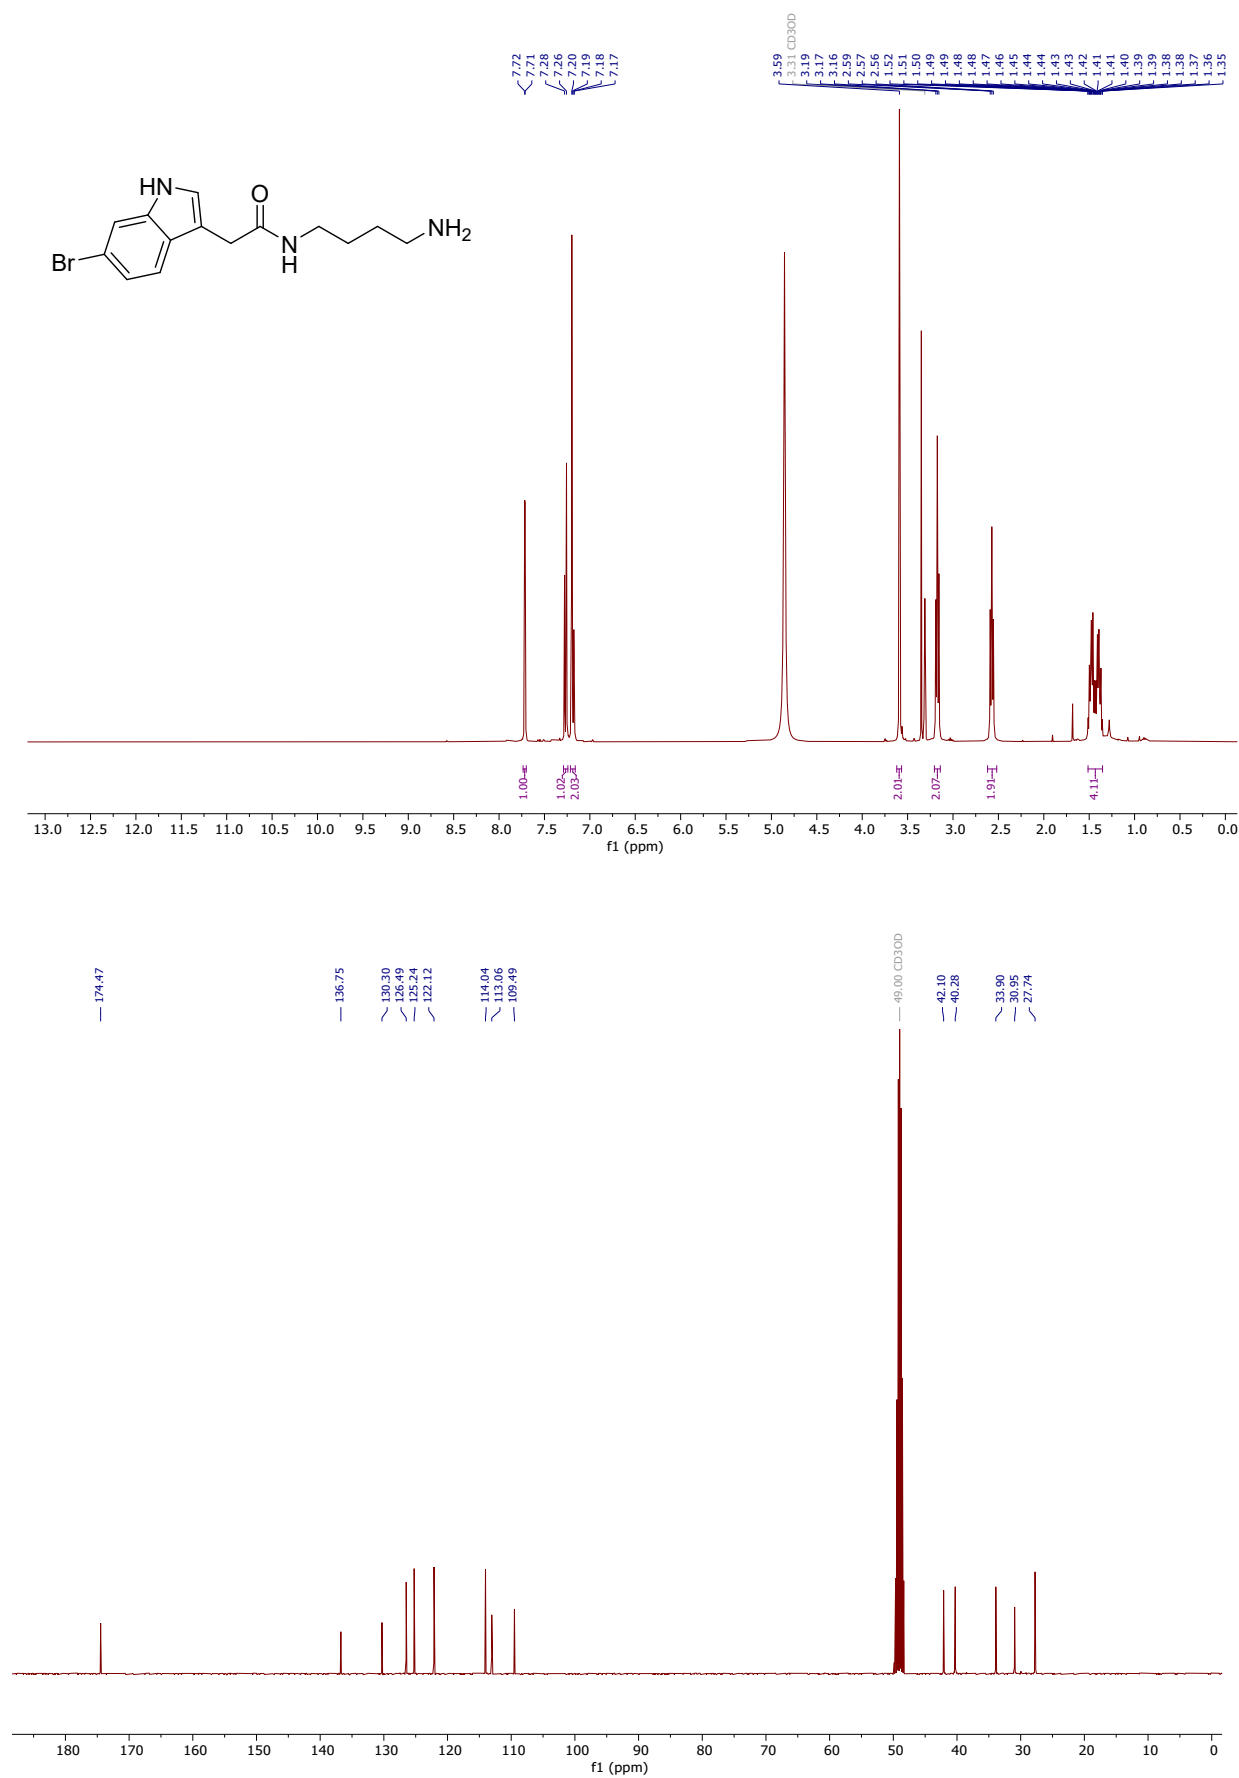

**Figure S9.**  $^1\text{H}$ -NMR and  $^{13}\text{C}$ -NMR spectrum of **8c** in Methanol- $d_4$ 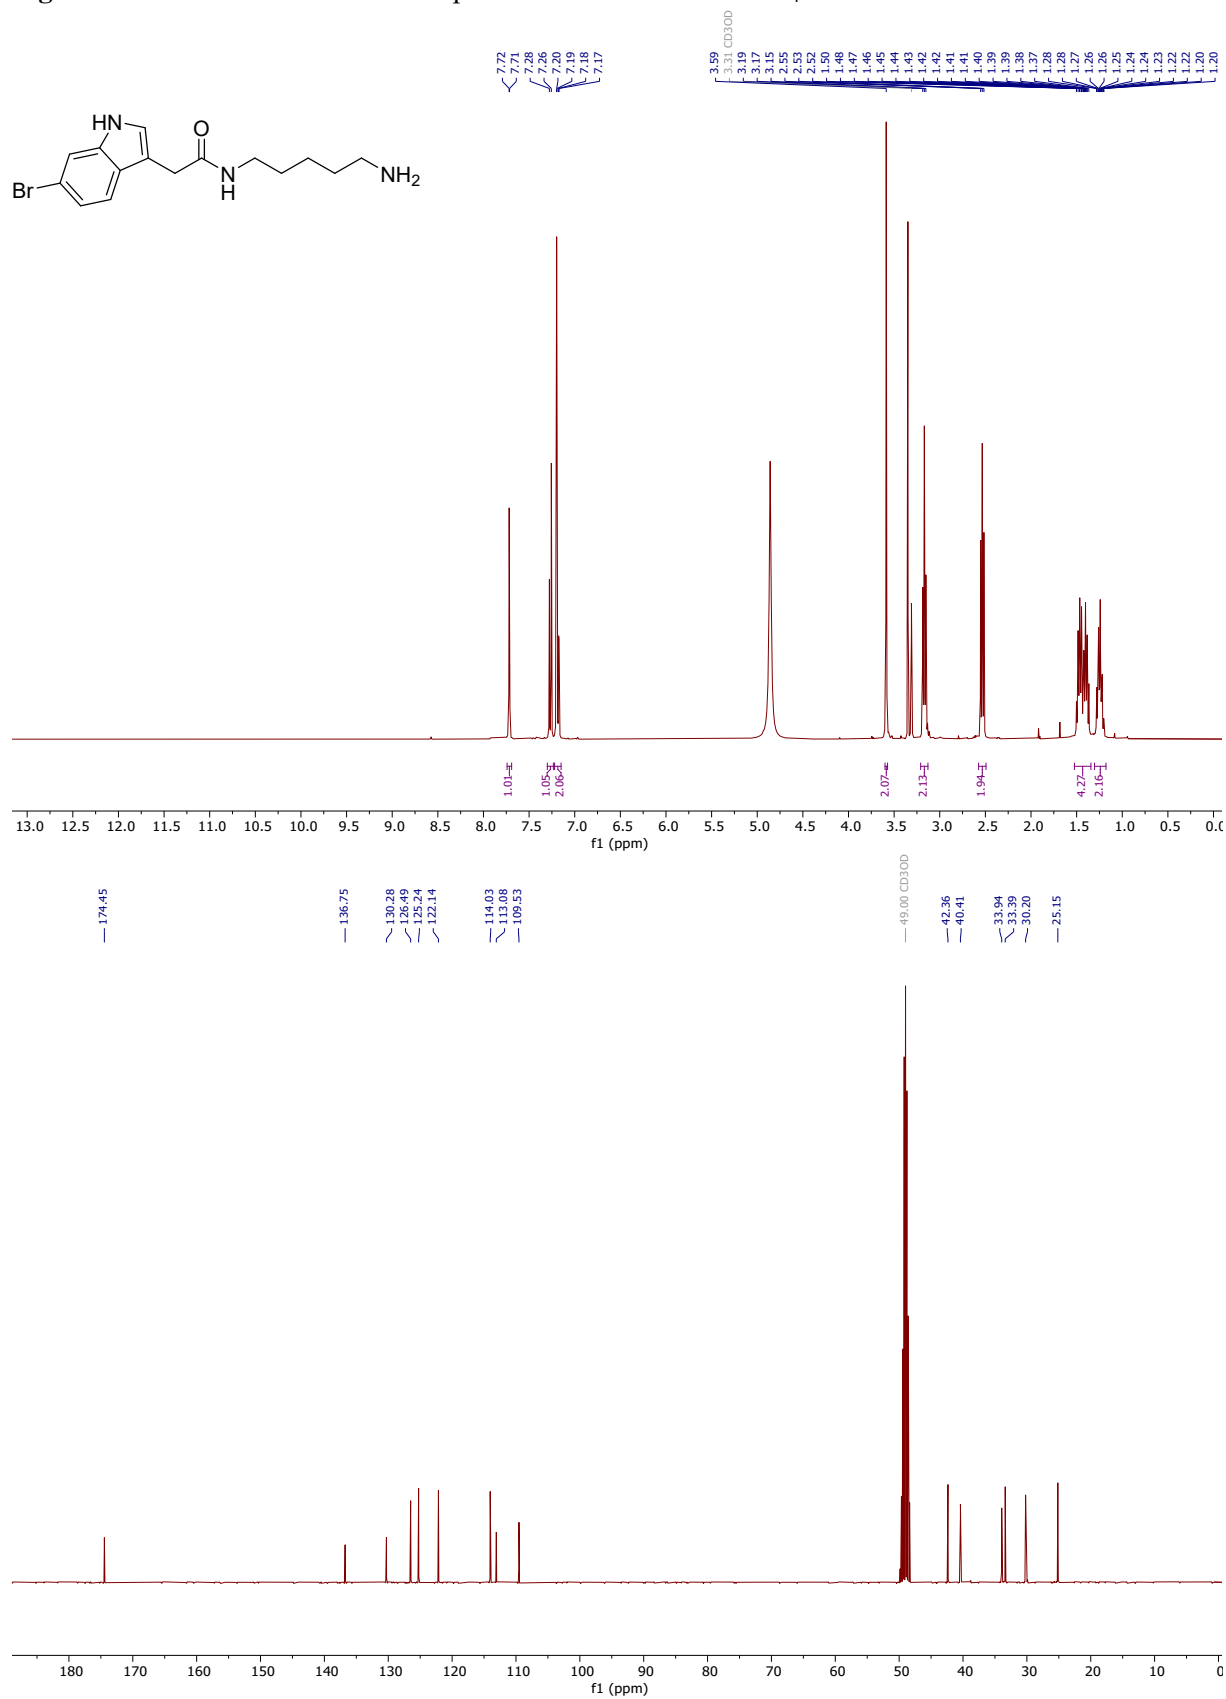

**Figure S10.**  $^1\text{H}$ -NMR and  $^{13}\text{C}$ -NMR spectrum of **8d** in Methanol- $d_4$ 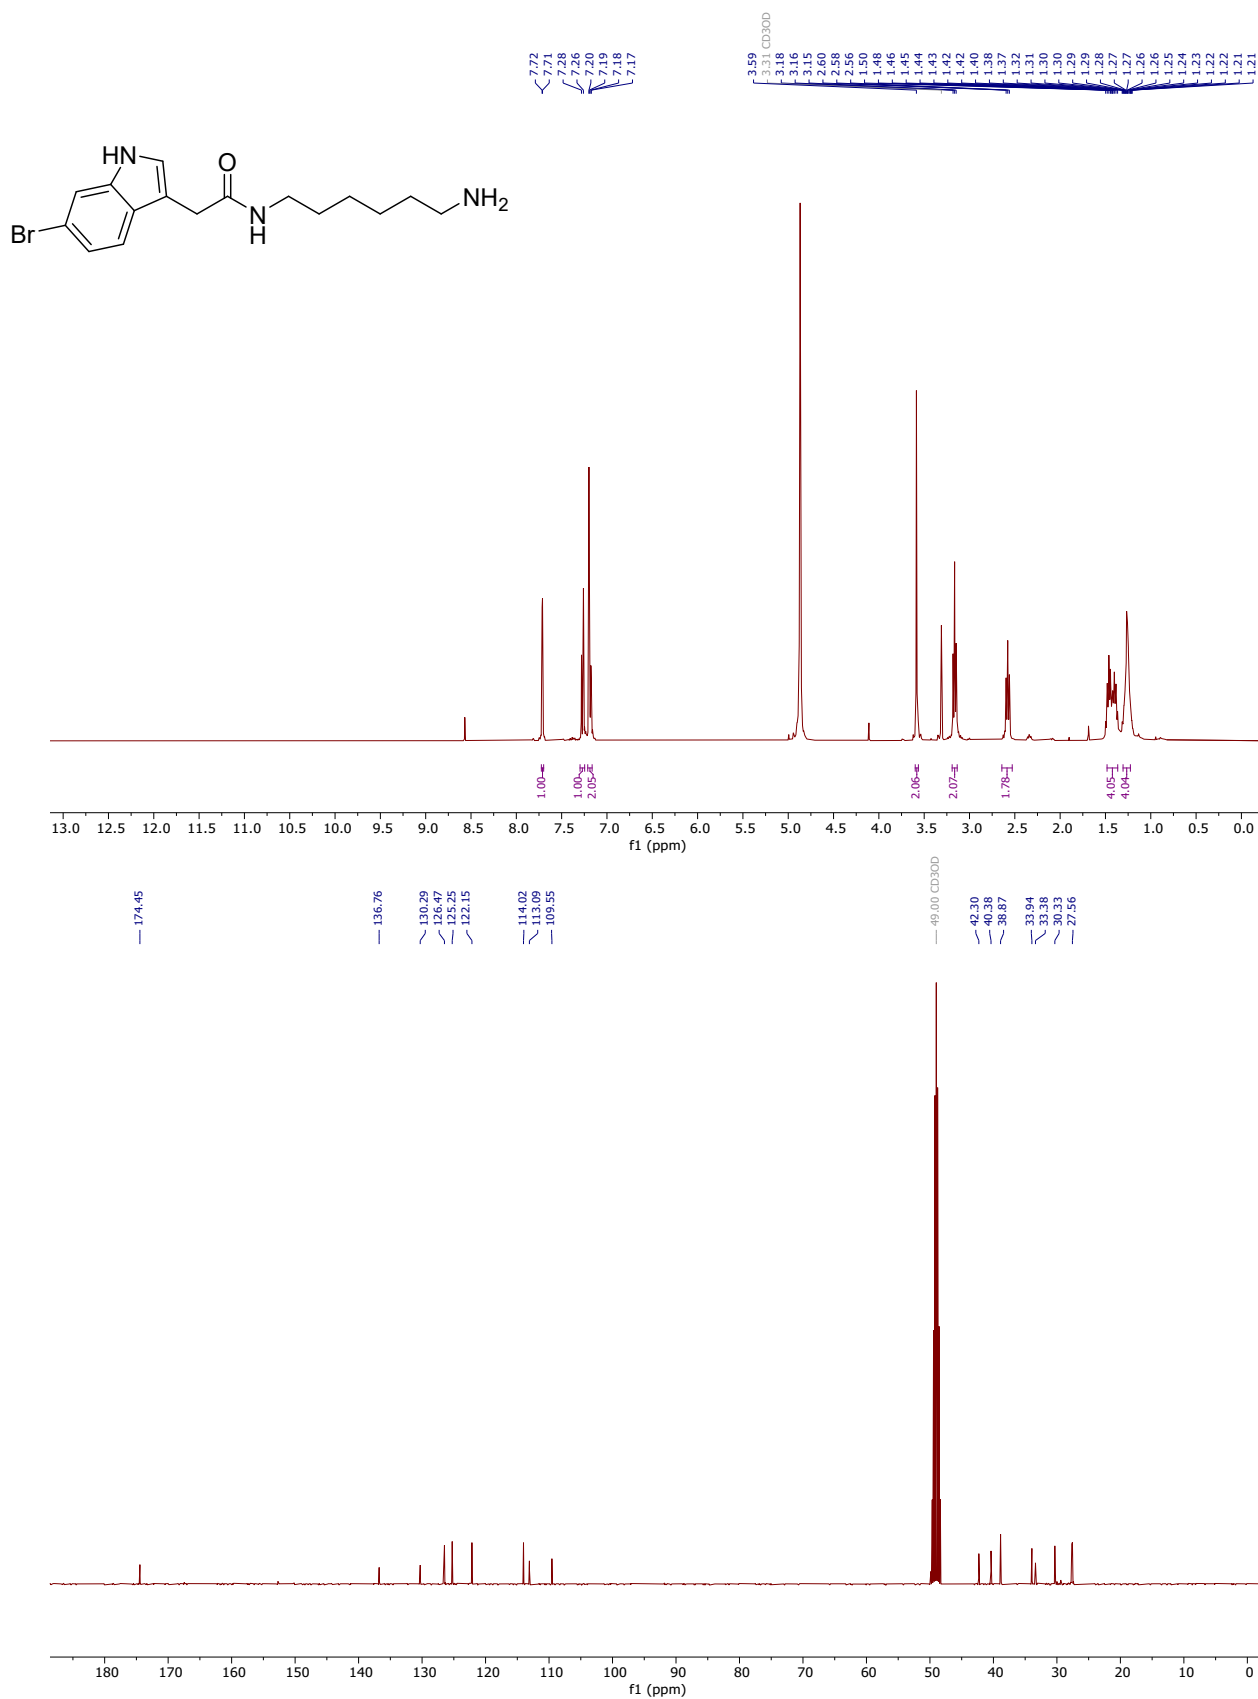

Figure S11  $^1\text{H}$ -NMR and  $^{13}\text{C}$ -NMR spectrum of **8e** in Methanol- $d_4$ 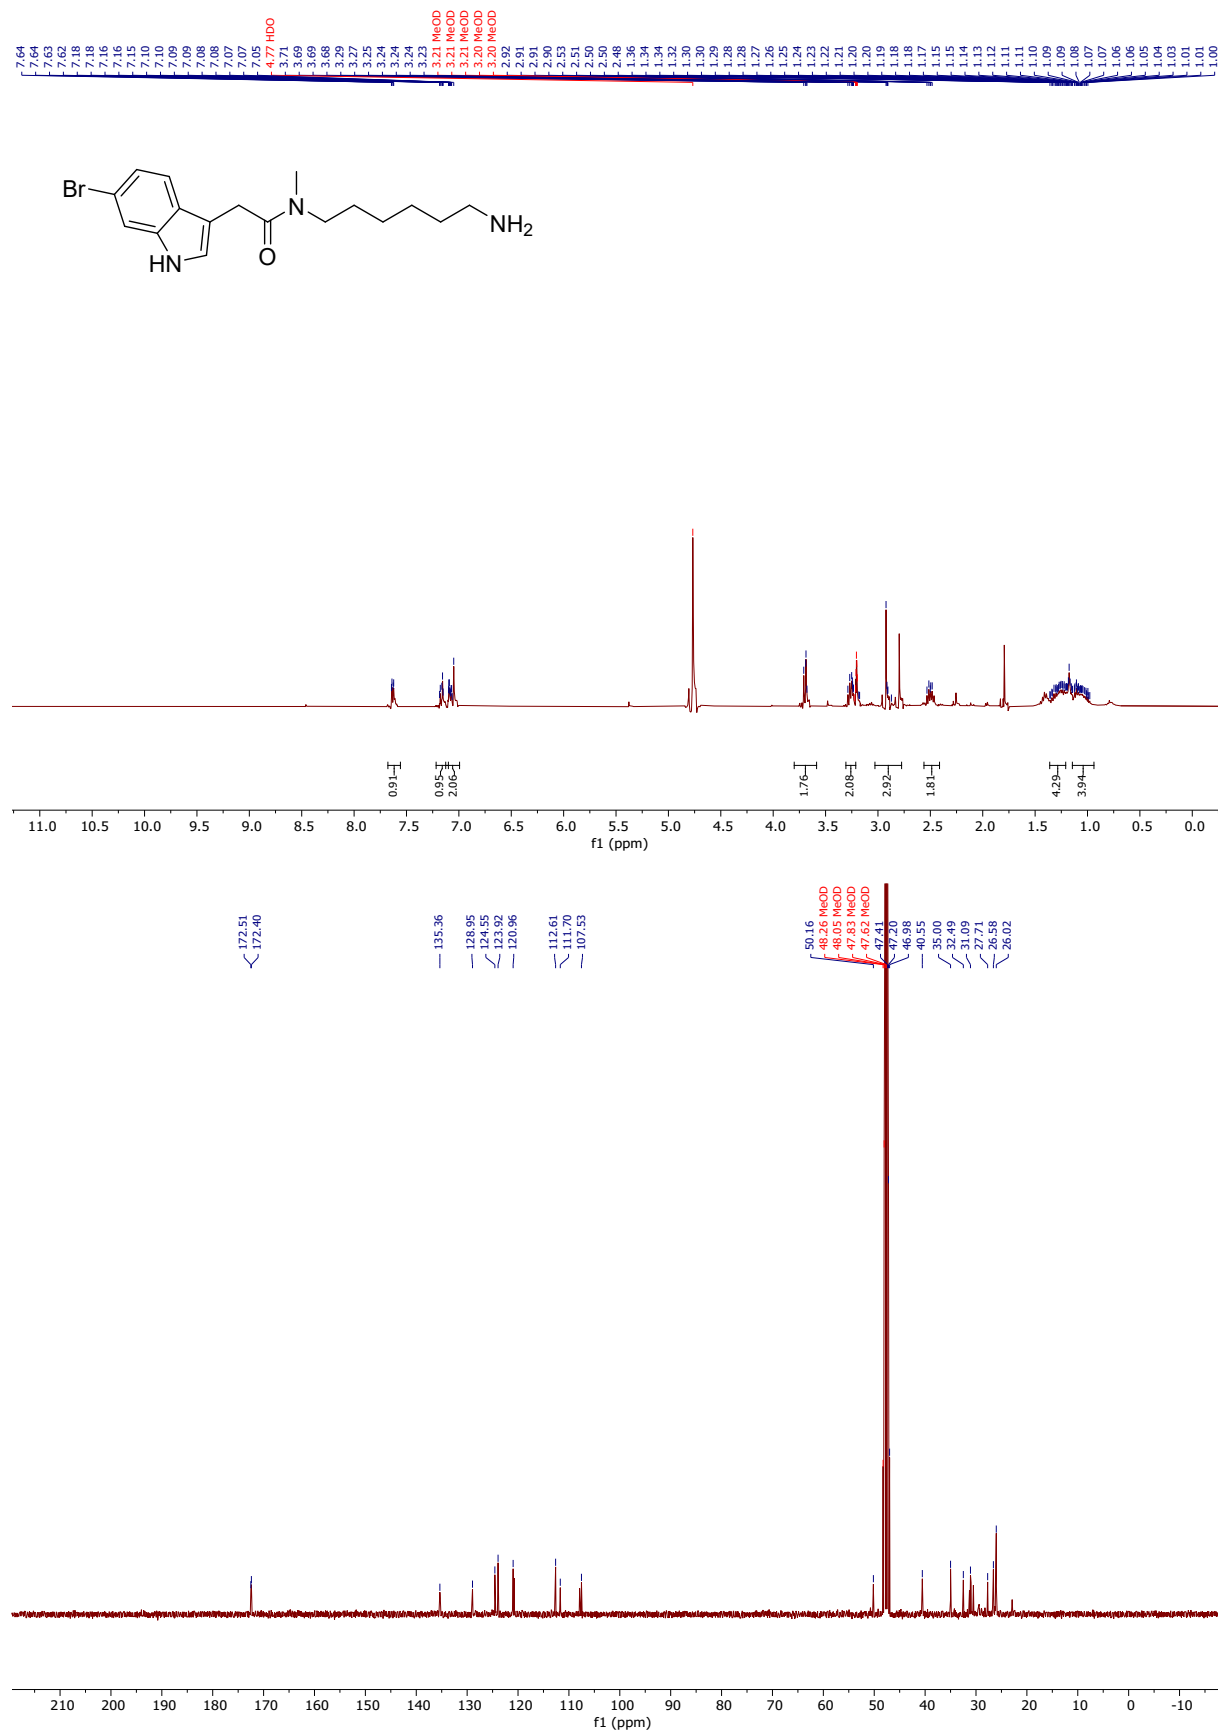

**Figure S12.**  $^1\text{H}$ -NMR and  $^{13}\text{C}$ -NMR spectrum of **9a intermediate** in Methanol- $d_4$ 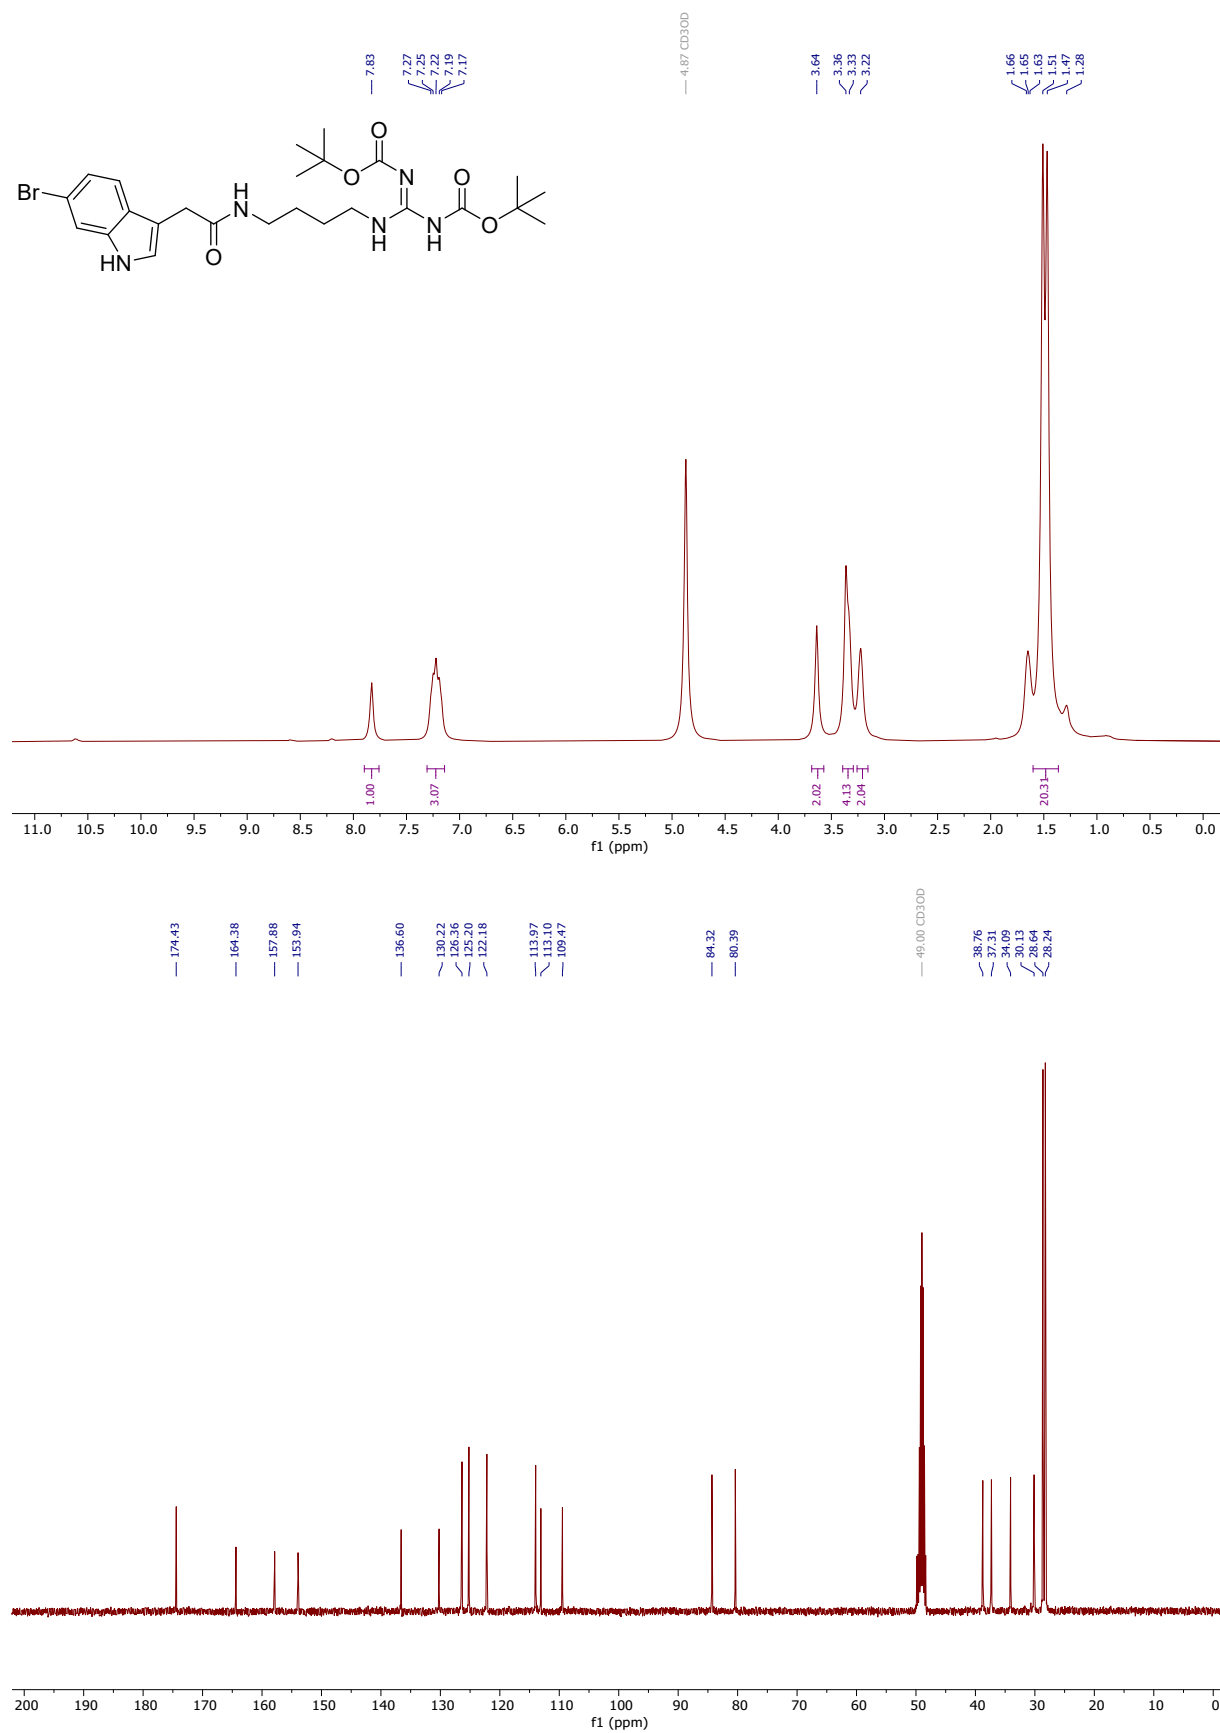

Figure S13.  $^1\text{H}$ -NMR and  $^{13}\text{C}$ -NMR spectrum of **9a** in Methanol- $d_4$ 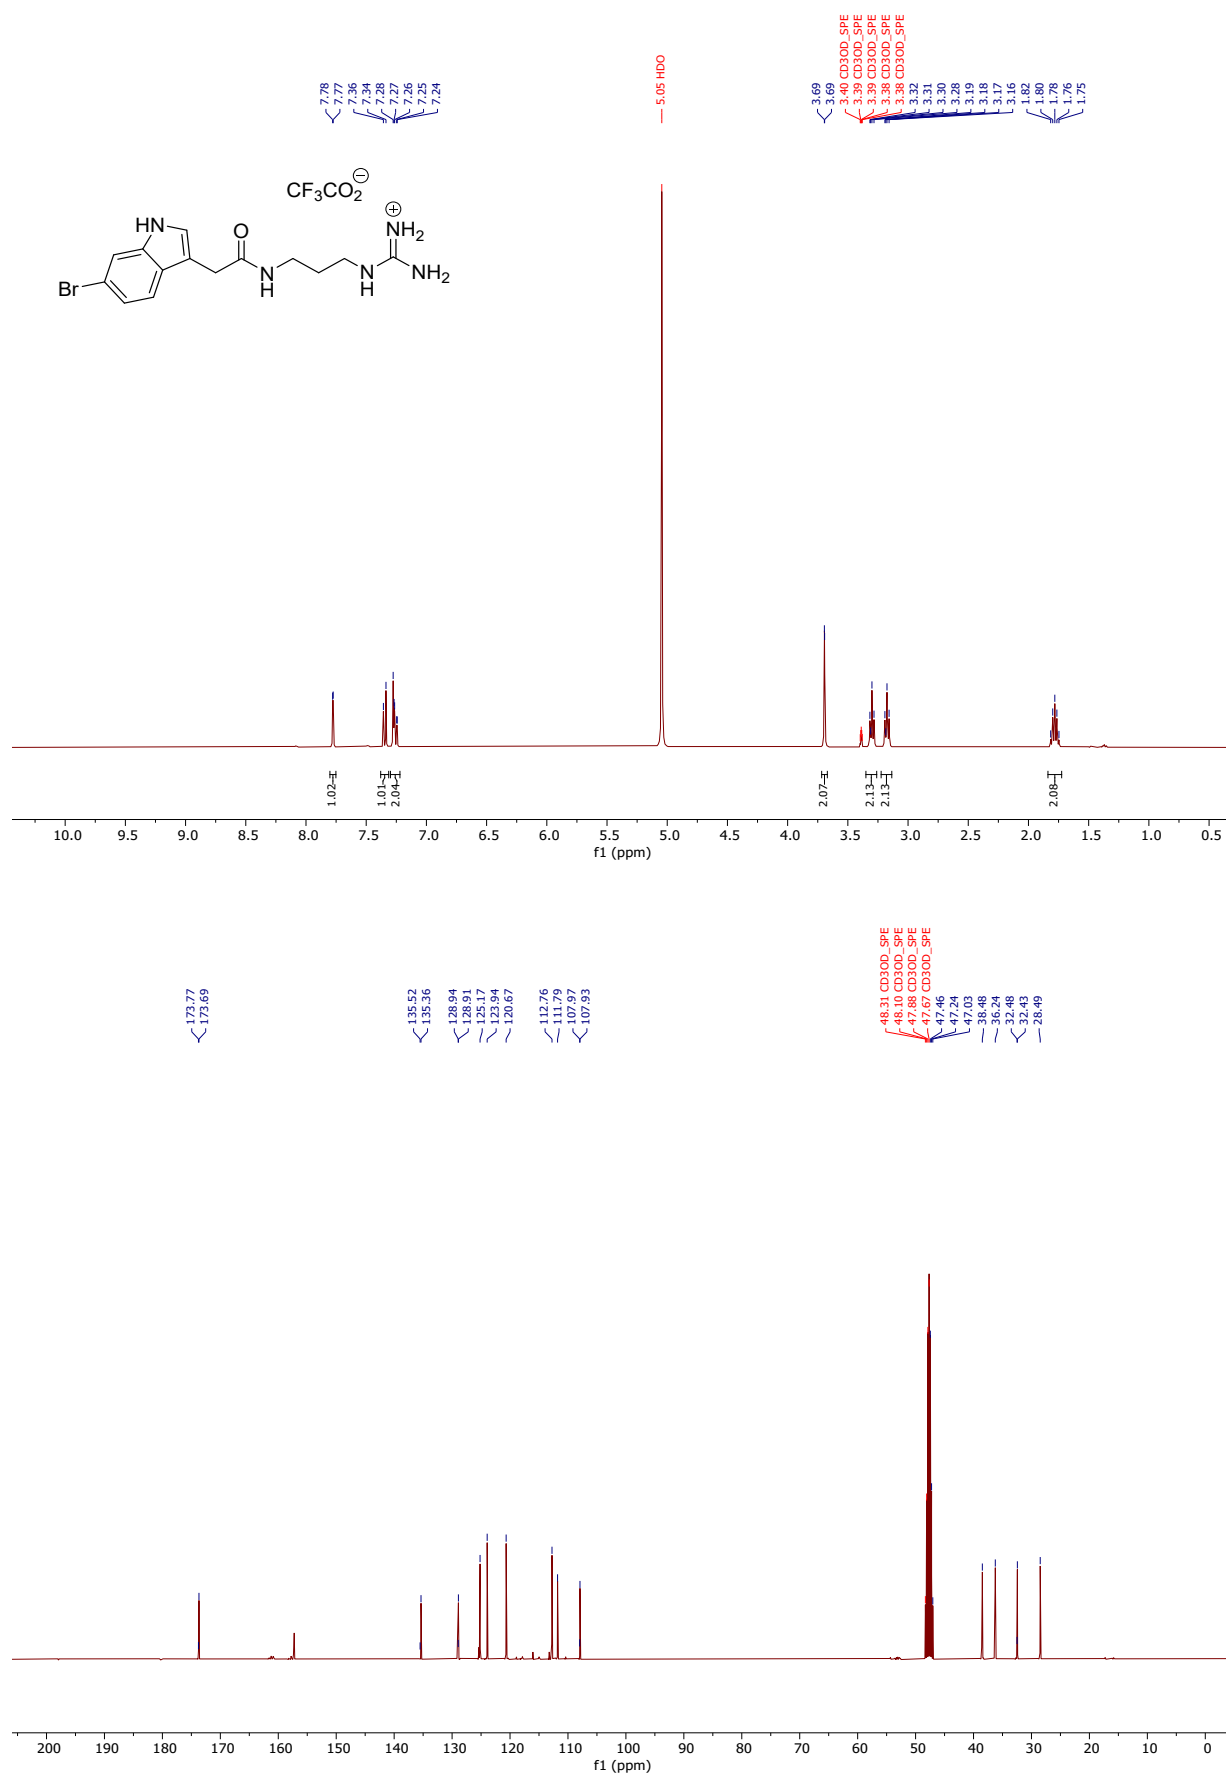

**Figure S14.**  $^1\text{H}$ -NMR and  $^{13}\text{C}$ -NMR spectrum of **9b intermediate** in Methanol- $d_4$ 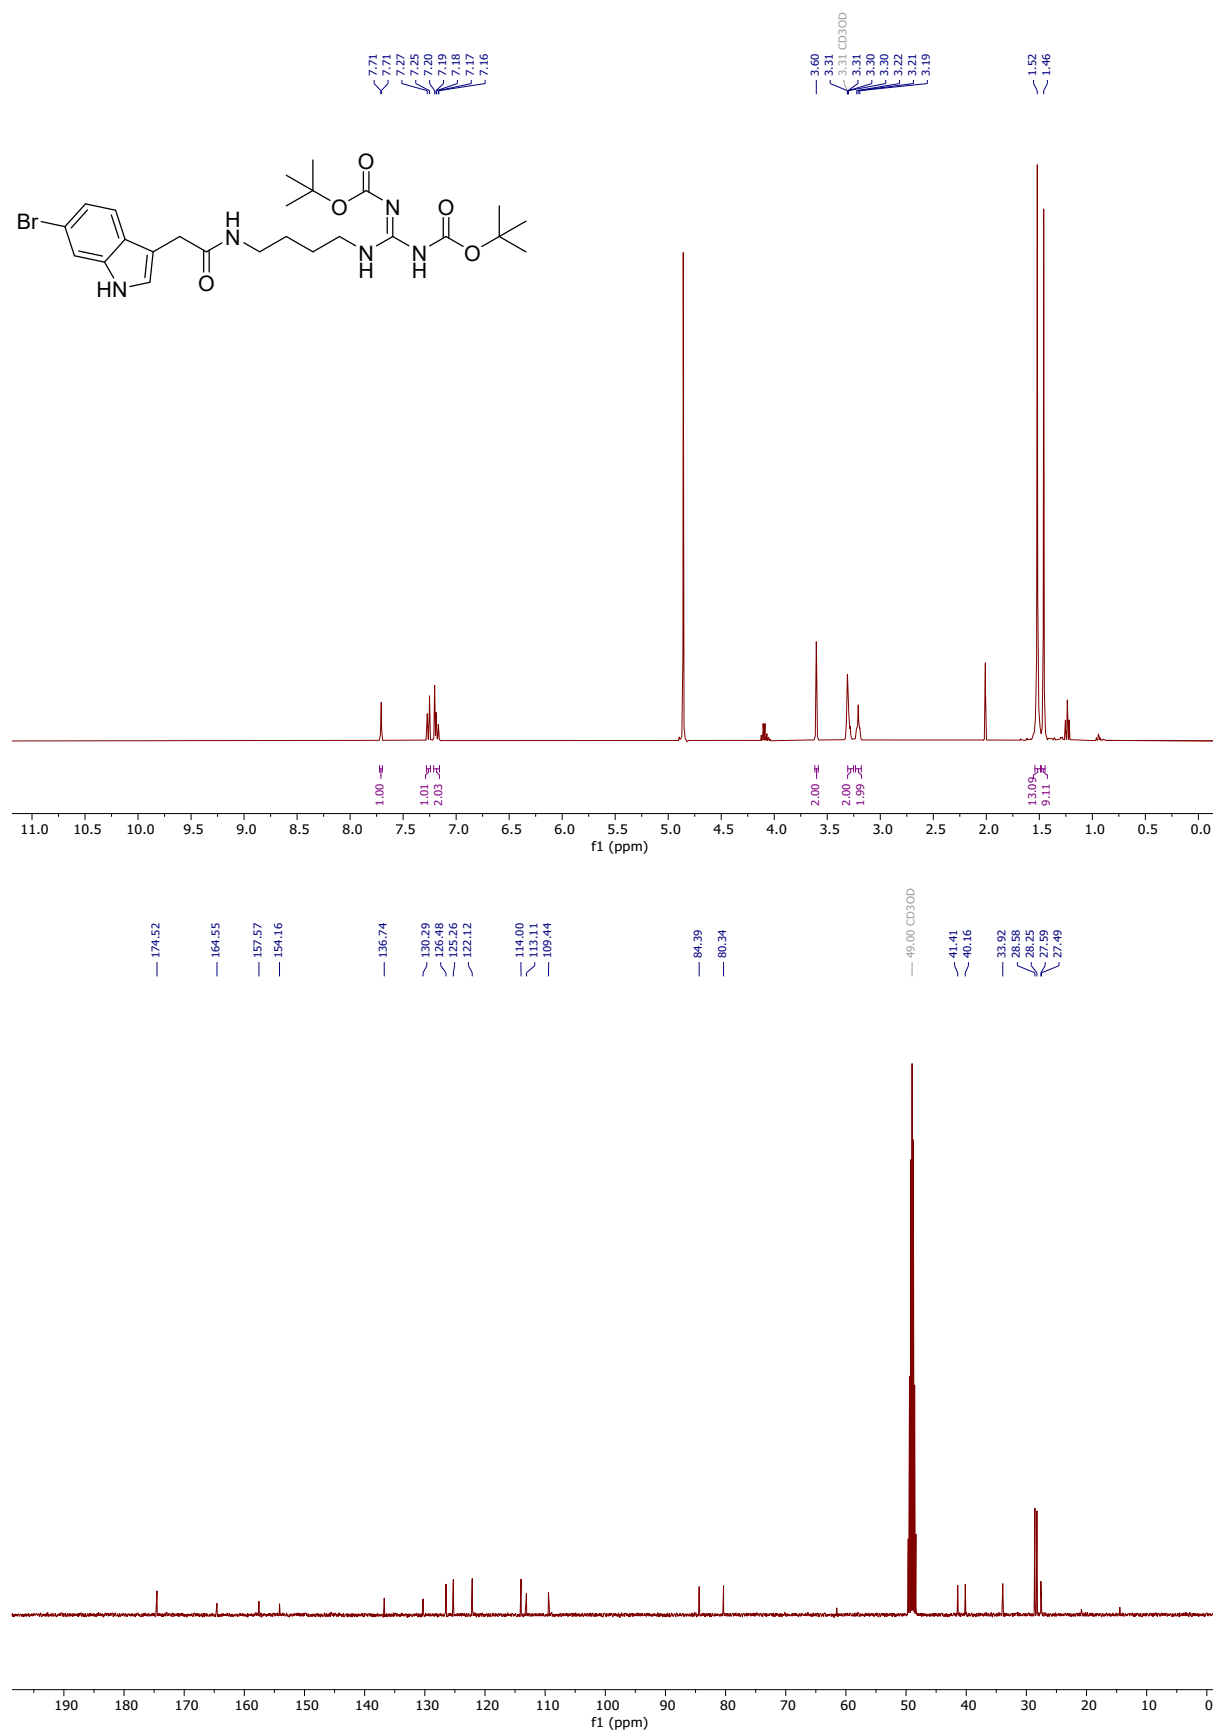



**Figure S15.**  $^1\text{H-NMR}$  and  $^{13}\text{C-NMR}$  spectrum of **9b** in Methanol- $d_4$ 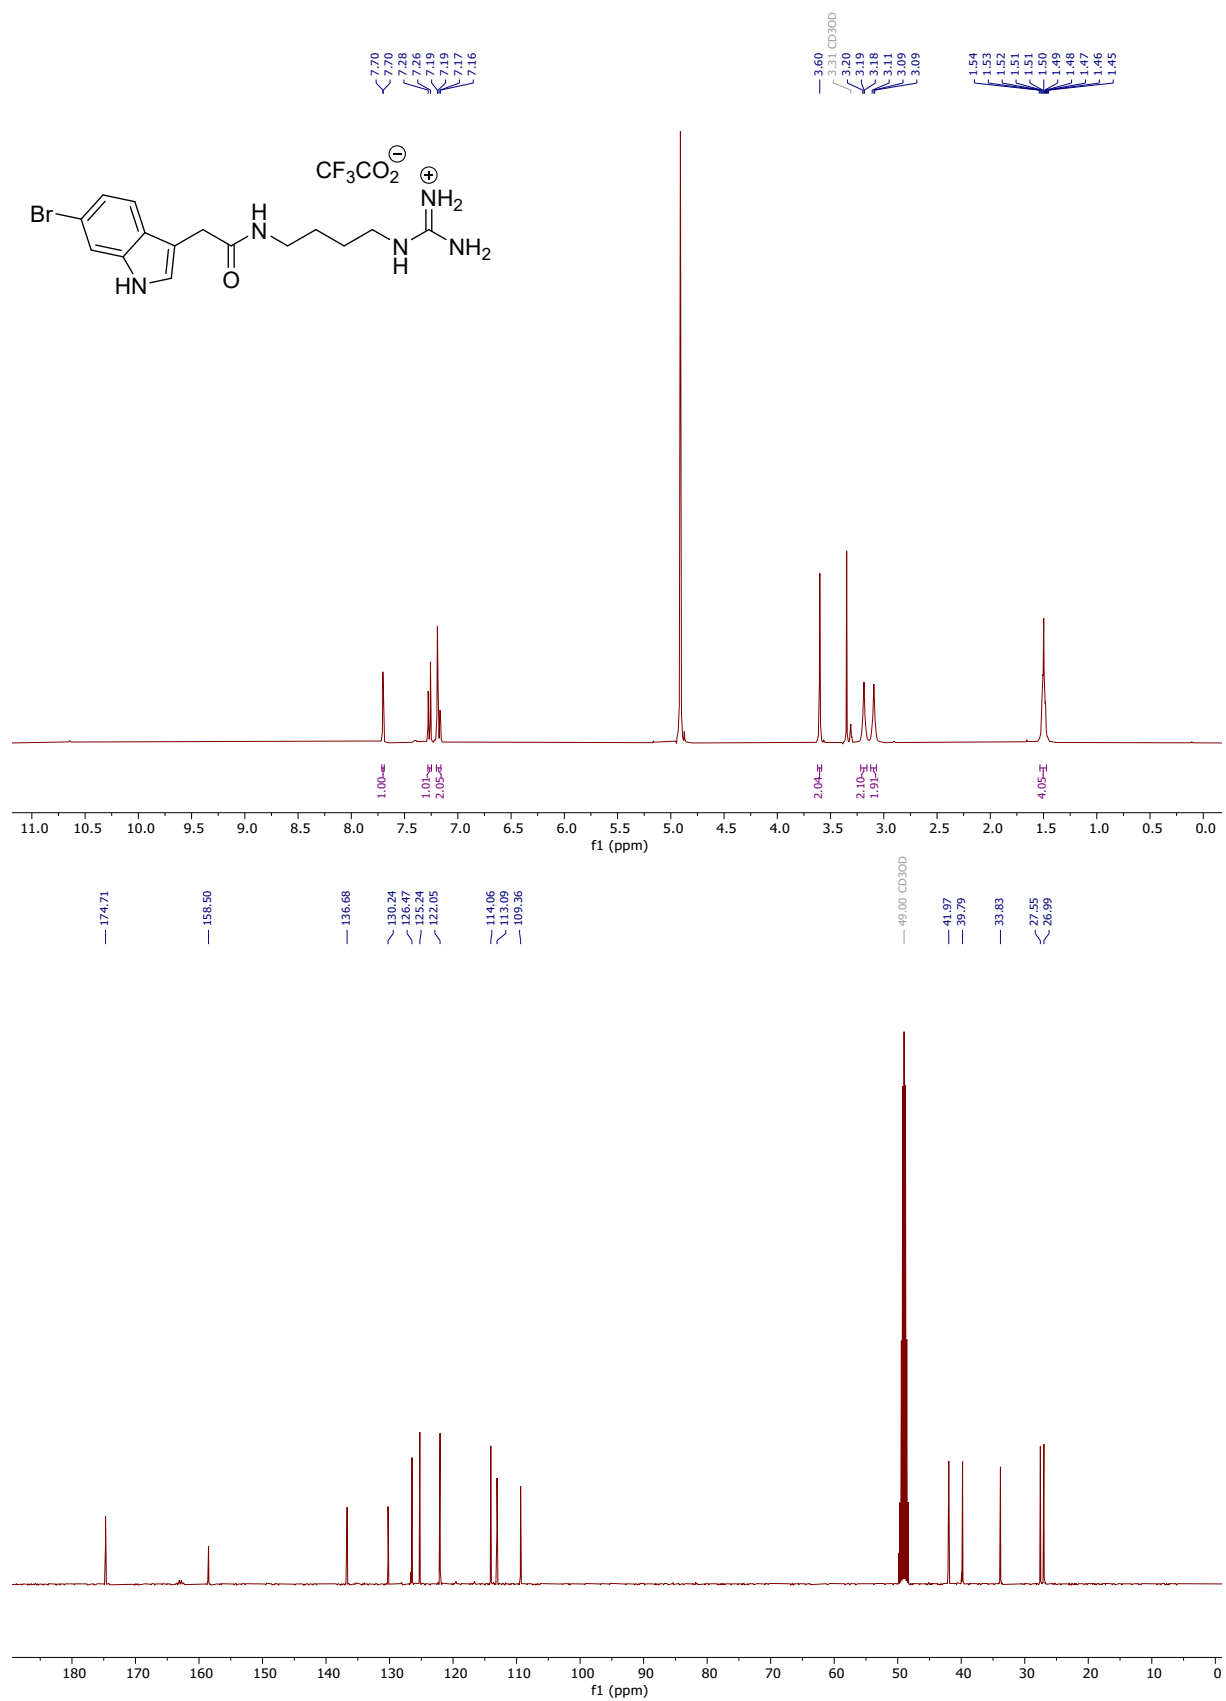

**Figure S16.**  $^1\text{H}$ -NMR and  $^{13}\text{C}$ -NMR spectrum of **9c intermediate** in Methanol- $d_4$

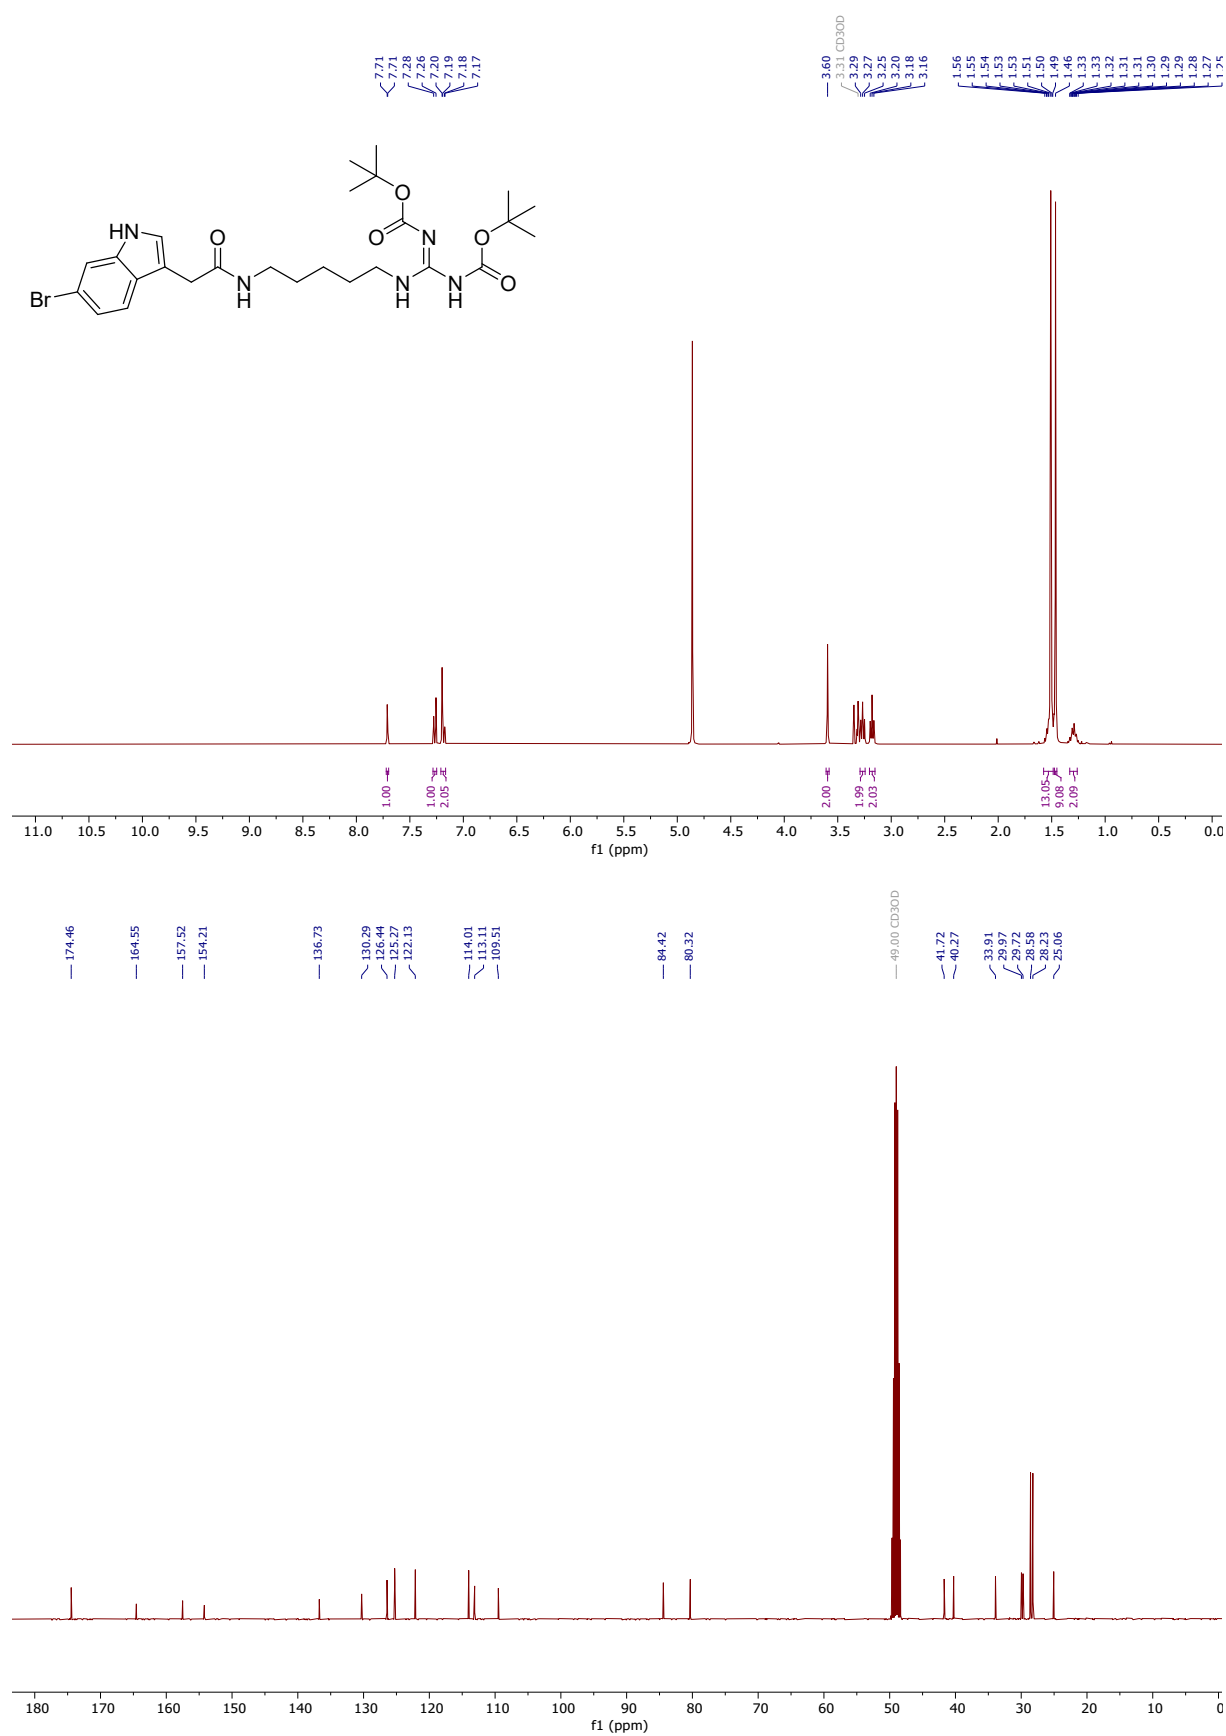

Figure S17.  $^1\text{H-NMR}$  and  $^{13}\text{C-NMR}$  spectrum of **9c** in Methanol- $d_4$ 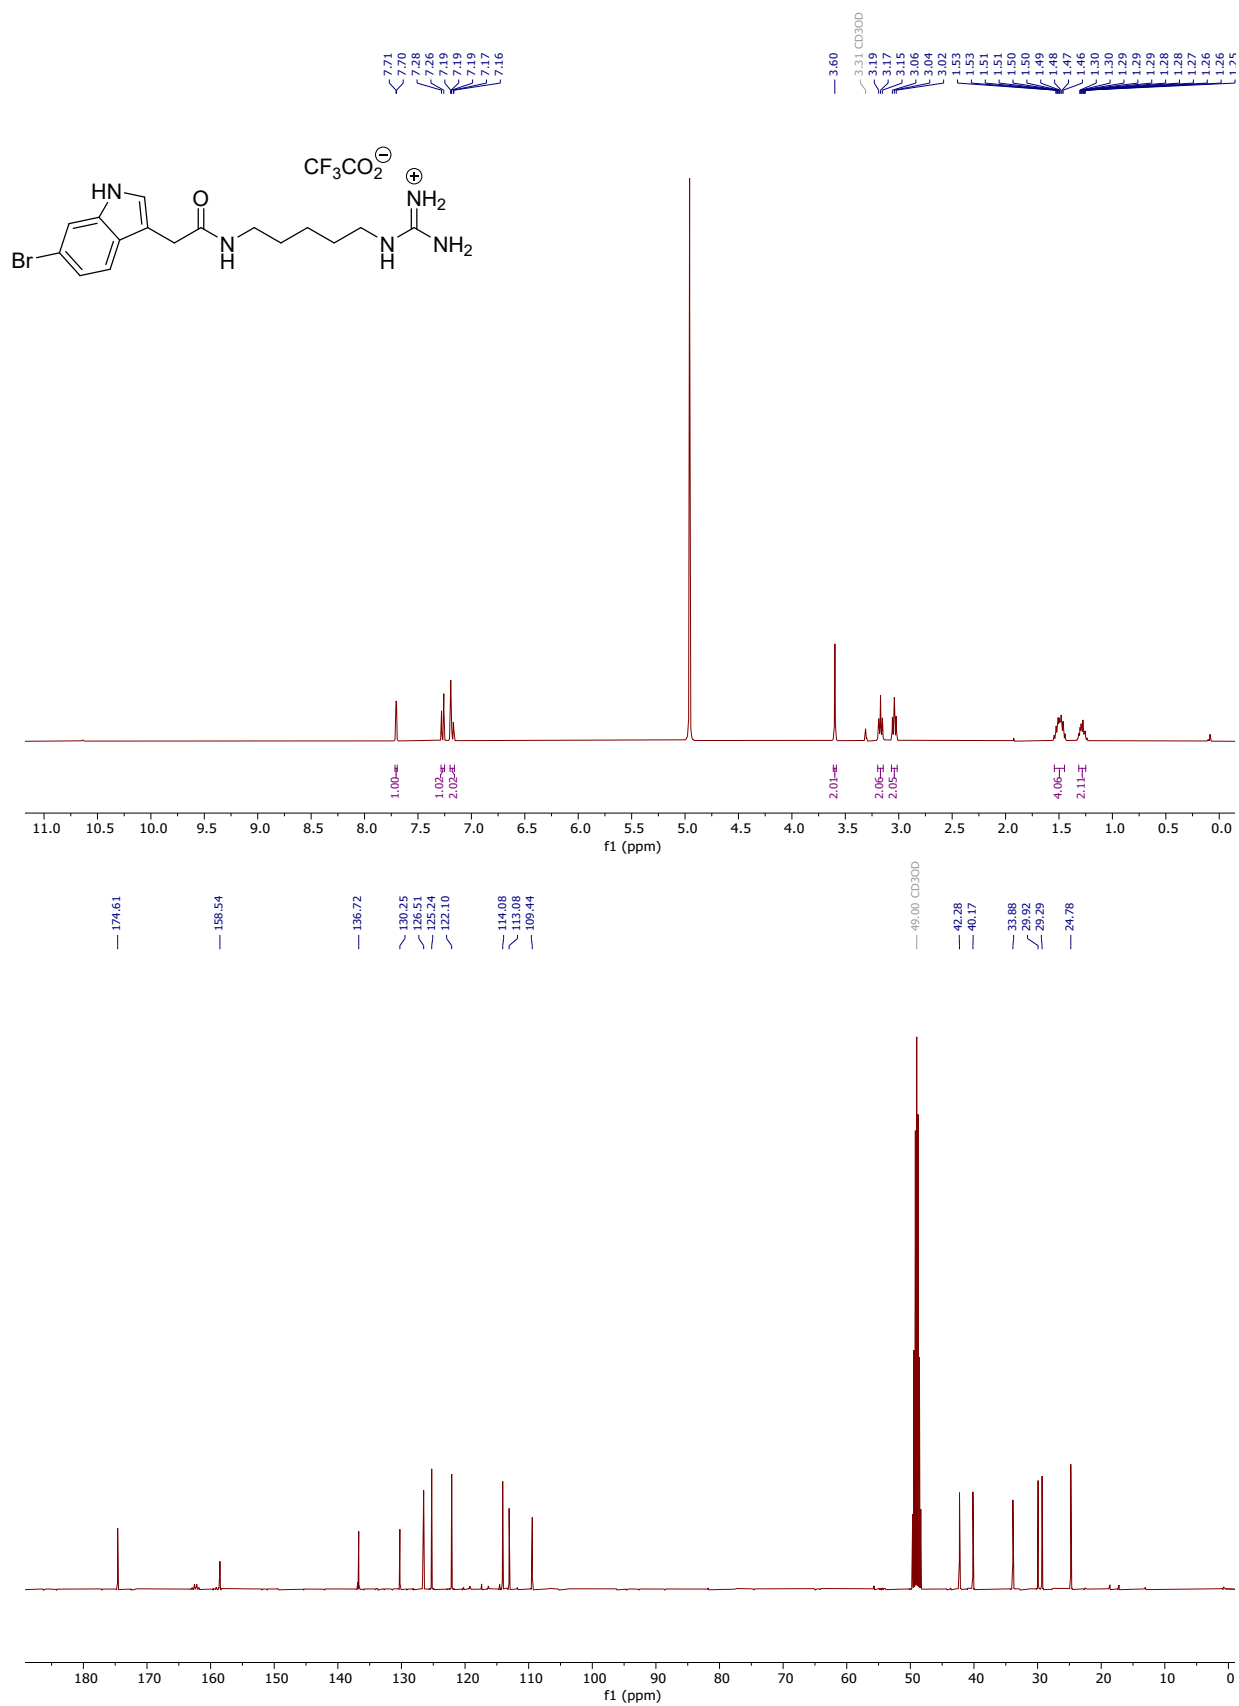

**Figure S18.** COSY and HSQC spectrum of **9c** in Methanol-*d*<sub>4</sub>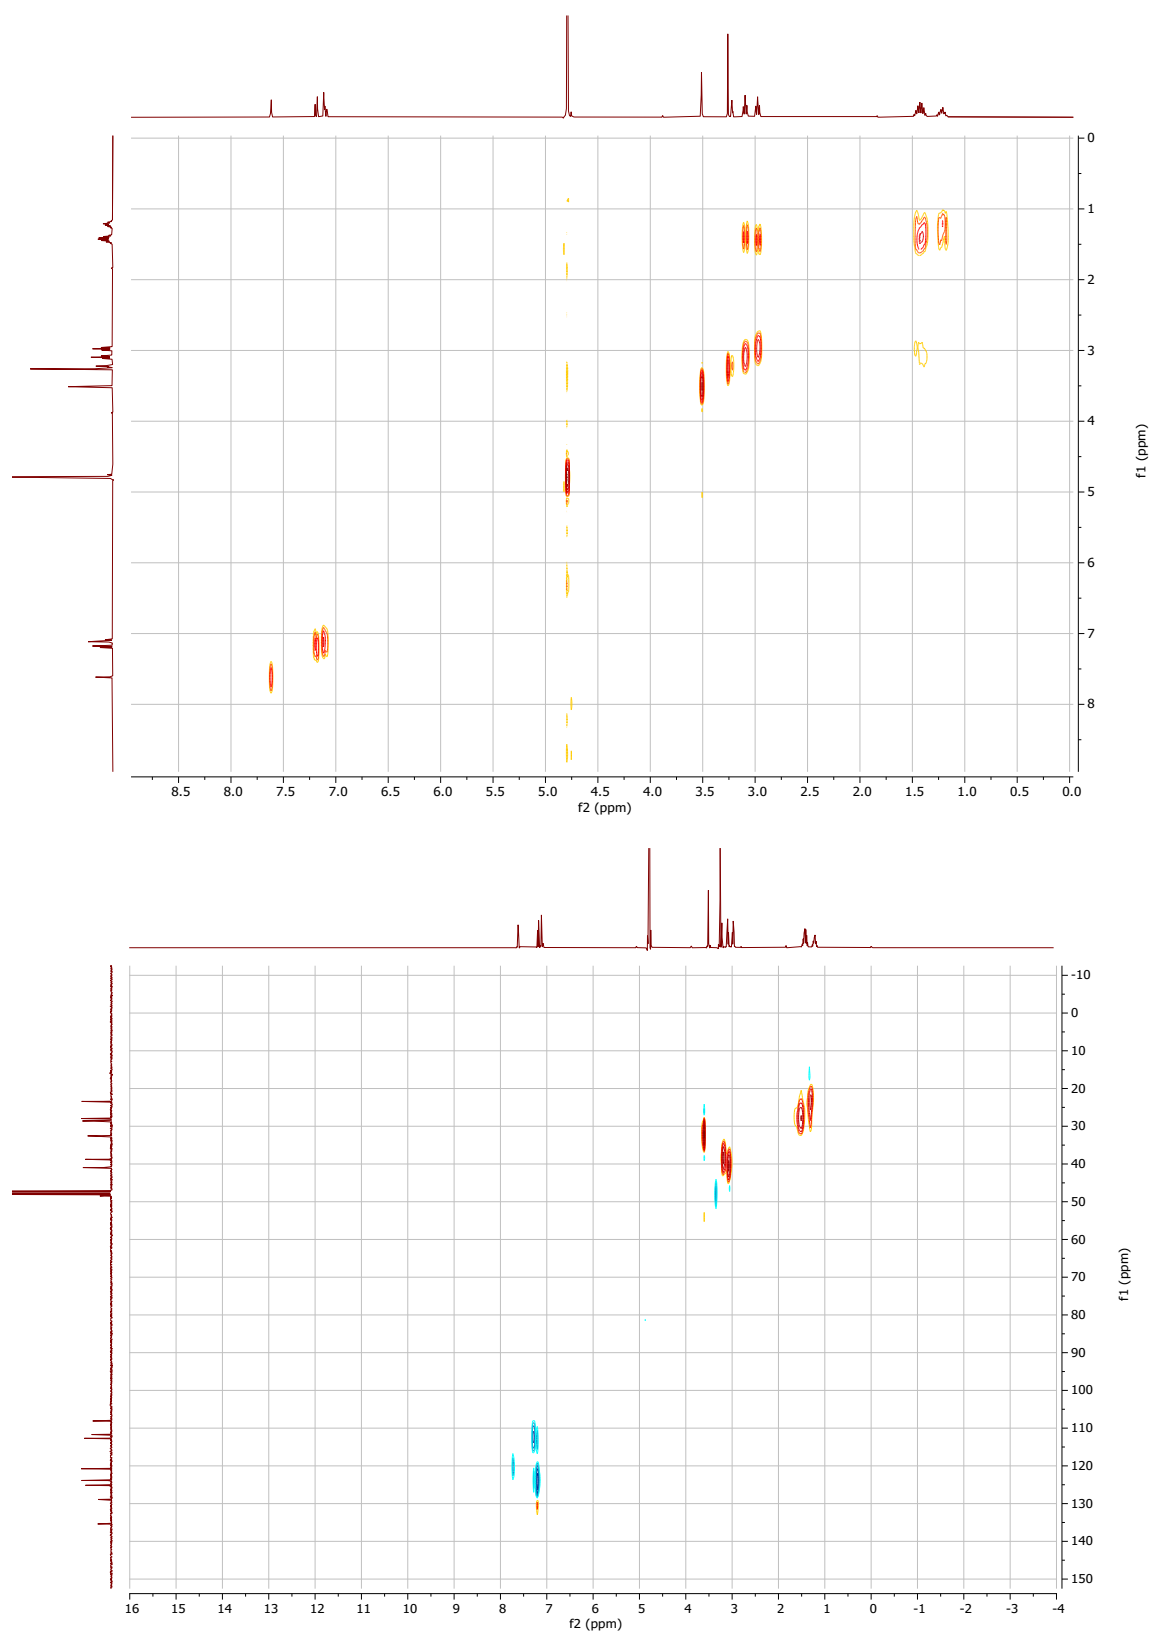

Figure S19. HMBC spectrum of **9c** in Methanol- $d_4$ 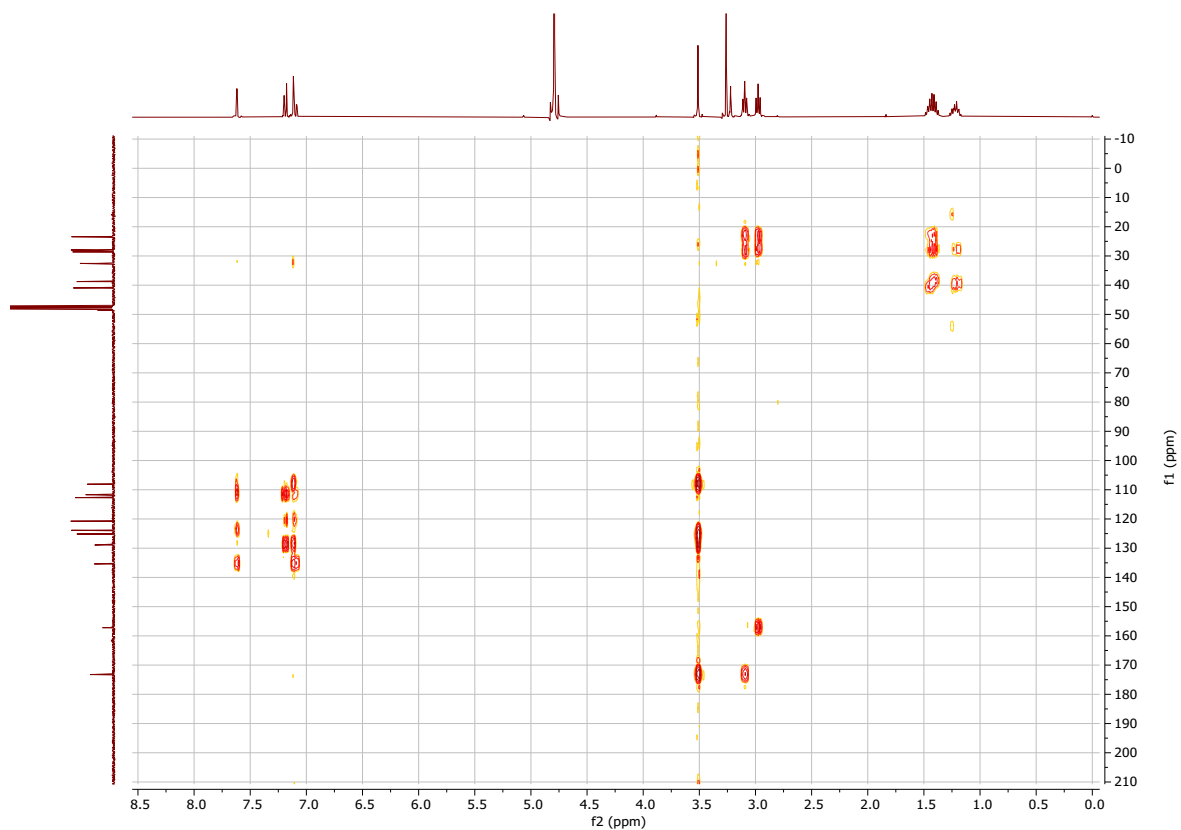Figure S20.  $^1\text{H}$ -NMR spectrum of **9d intermediate** in Methanol- $d_4$ 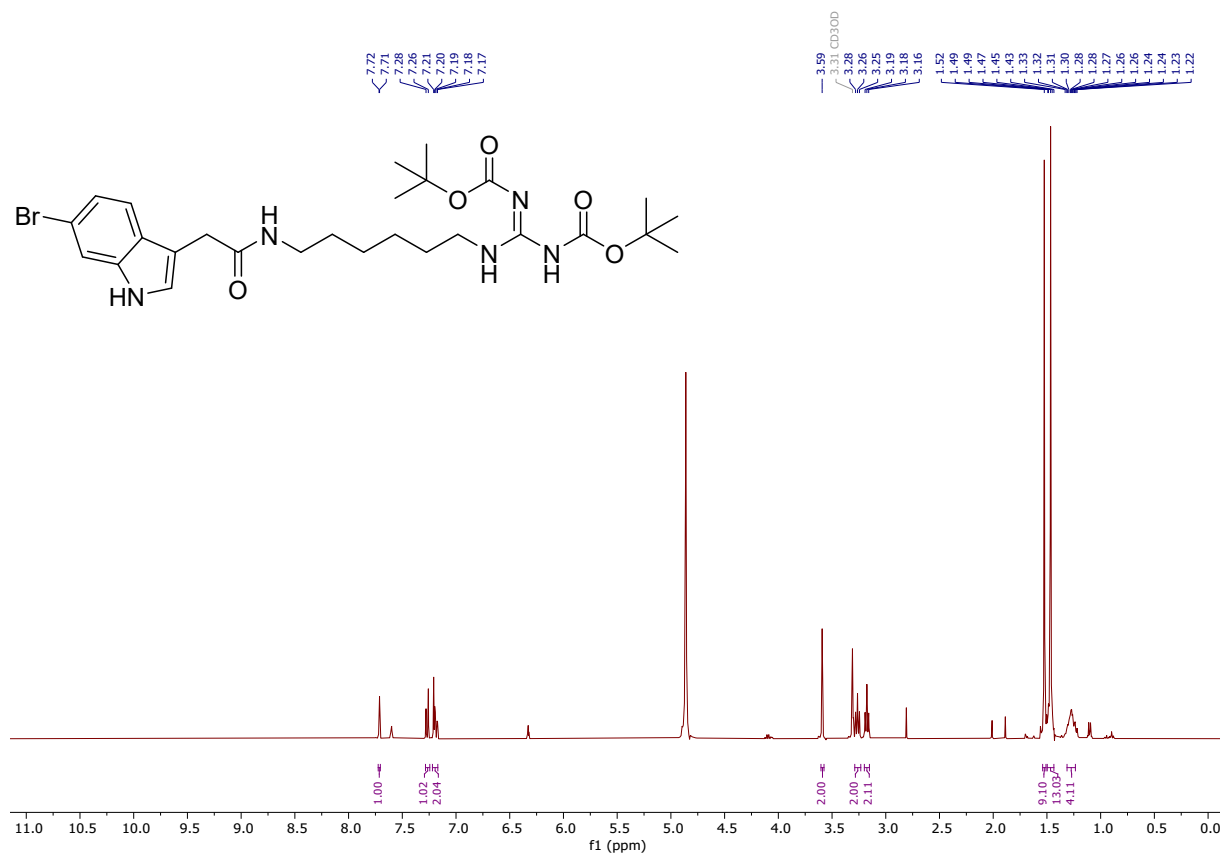

**Figure S21.**  $^1\text{H}$ -NMR and  $^{13}\text{C}$ -NMR spectrum of **9d** in Methanol- $d_4$ 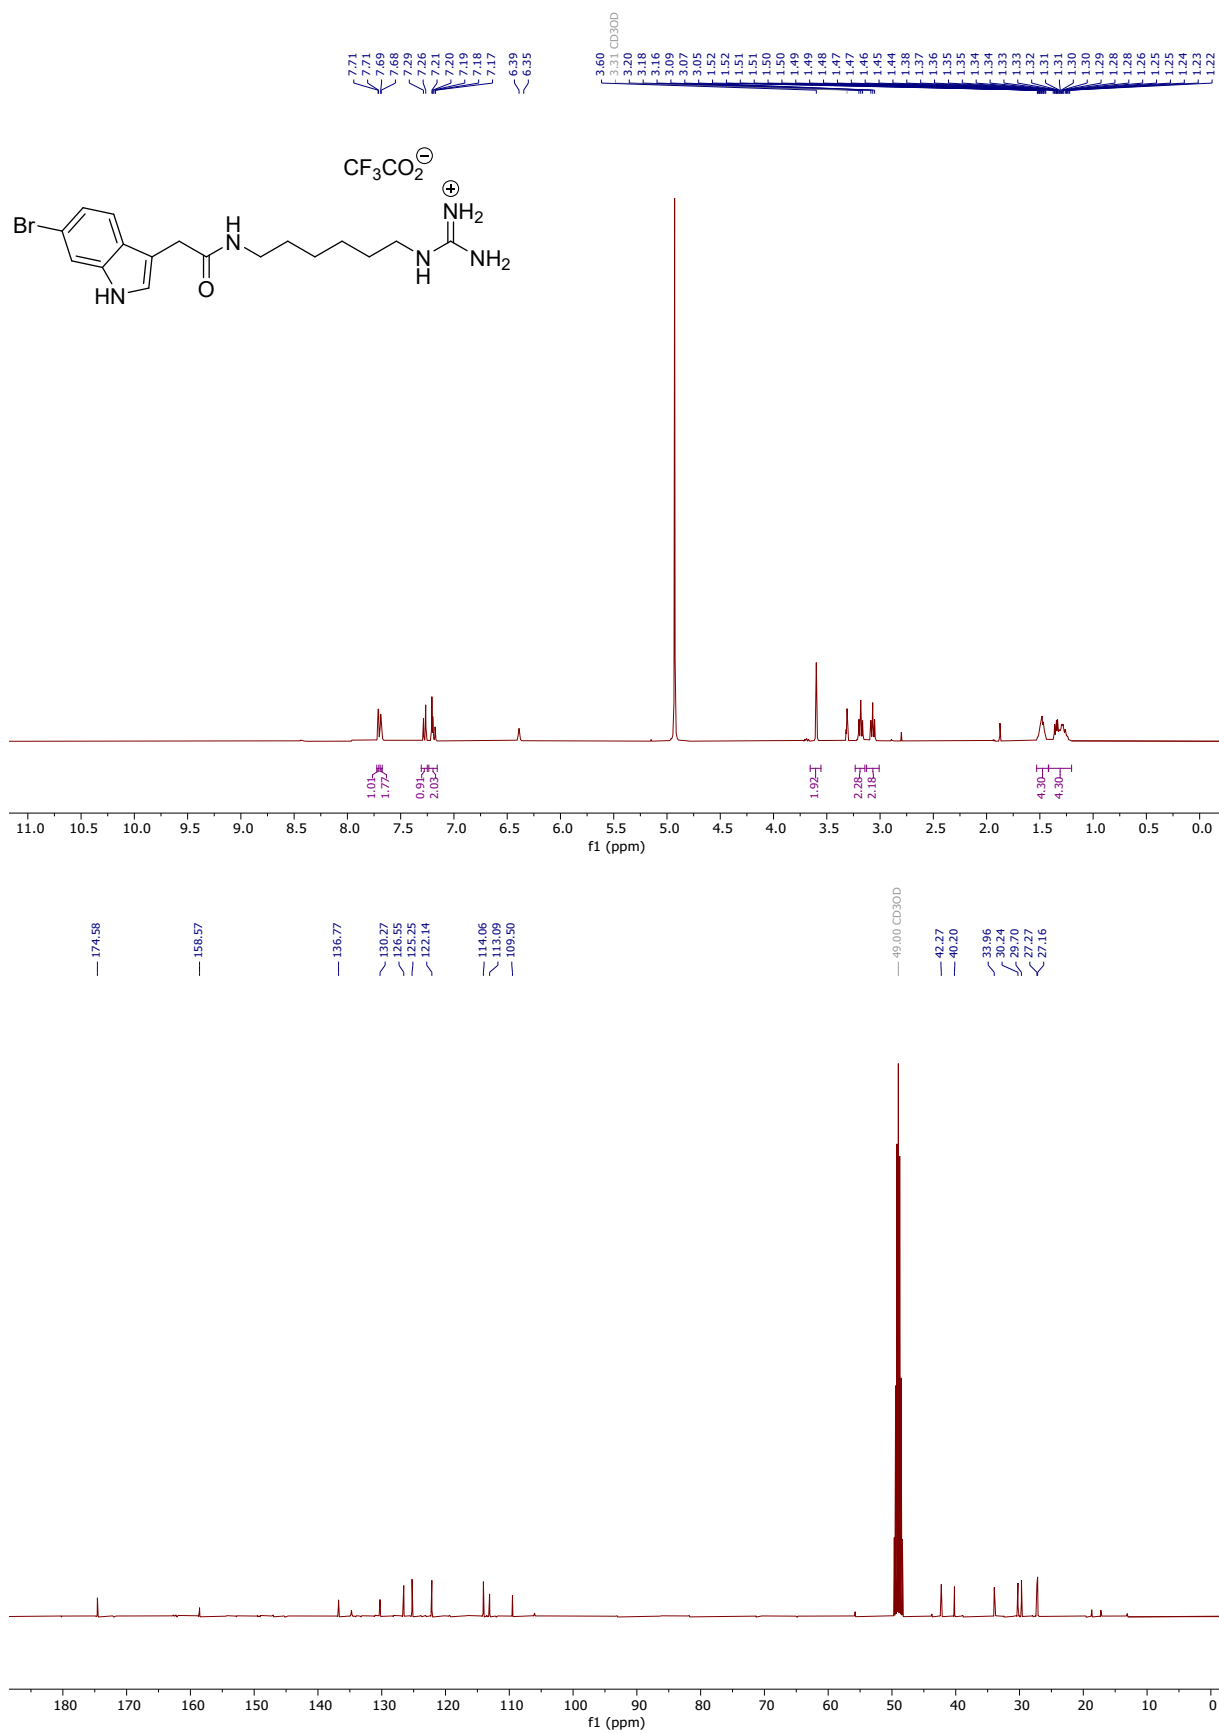

Figure S22.  $^1\text{H}$ -NMR and  $^{13}\text{C}$ -NMR spectrum of **9e** in Methanol- $d_4$ 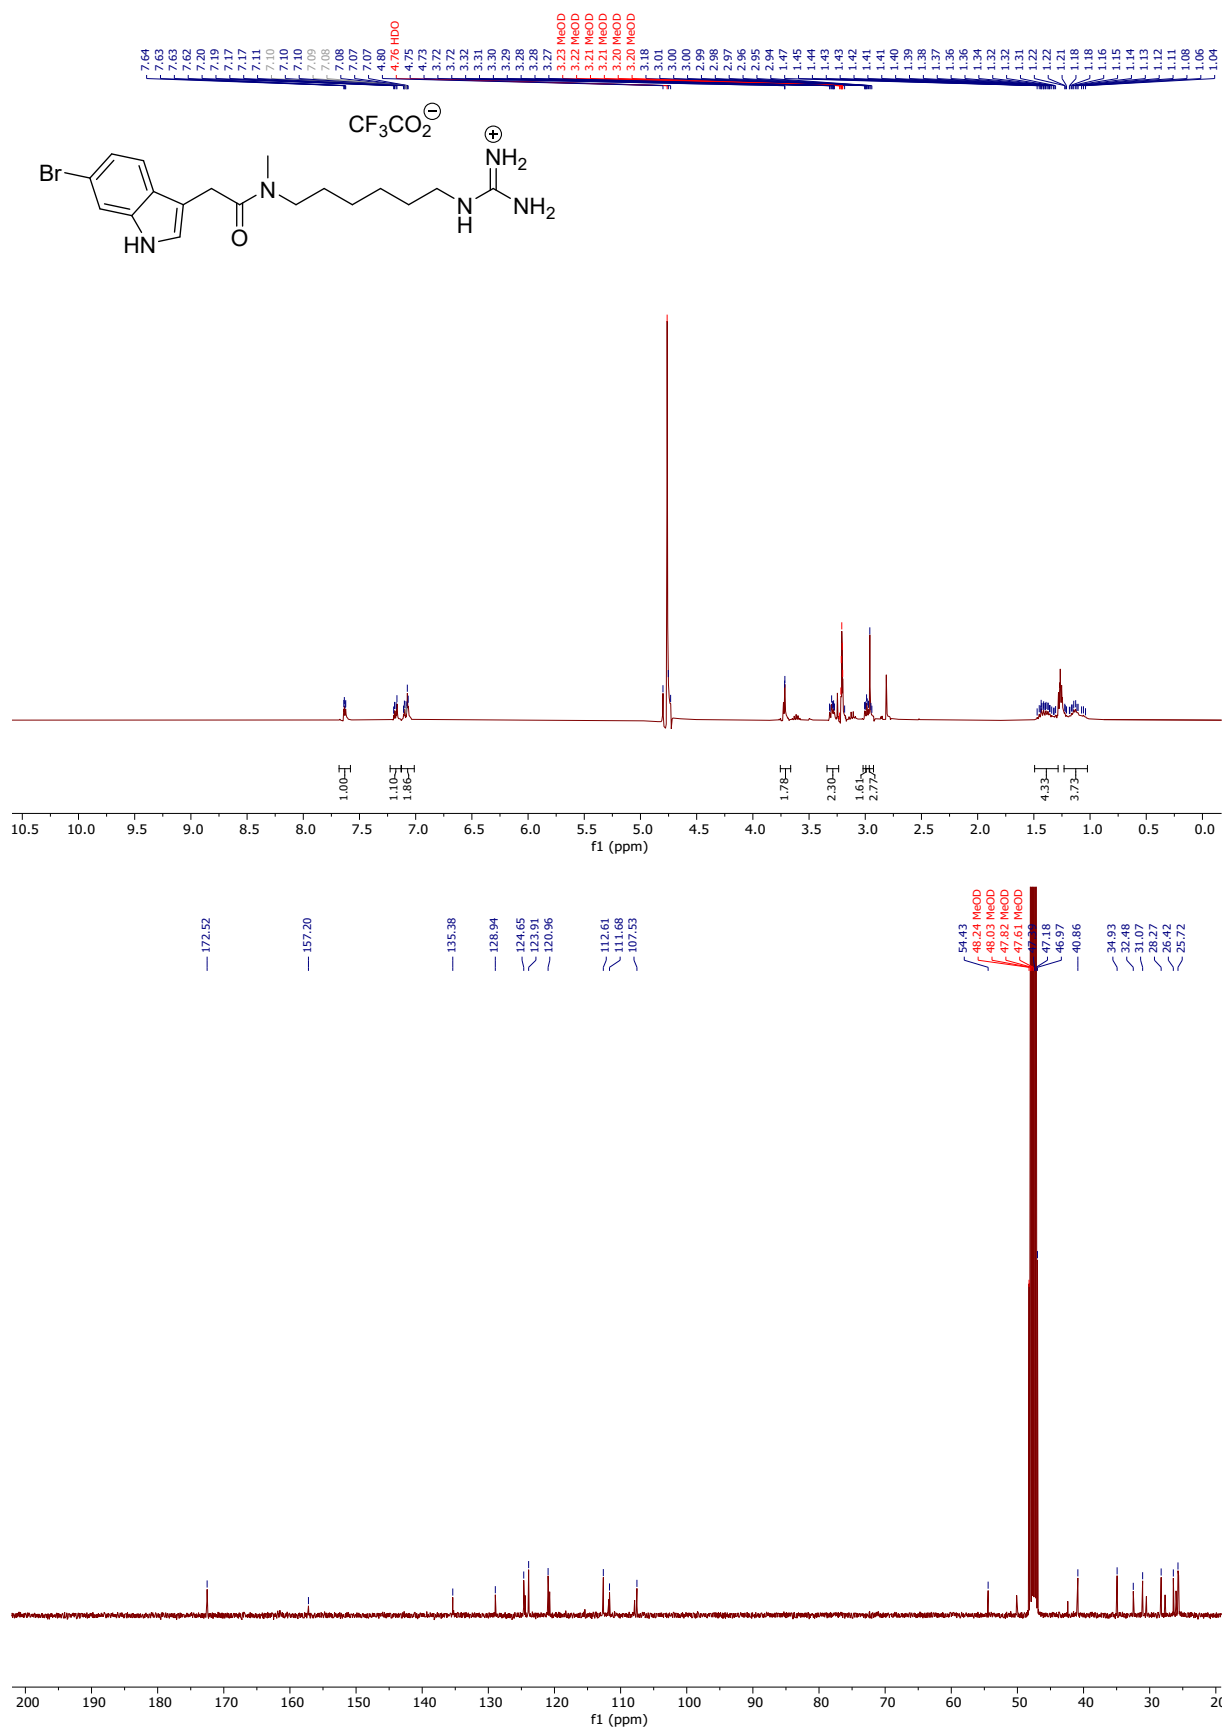

Figure S23.  $^1\text{H}$ -NMR and  $^{13}\text{C}$ -NMR spectrum of **10a** in Methanol- $d_4$ 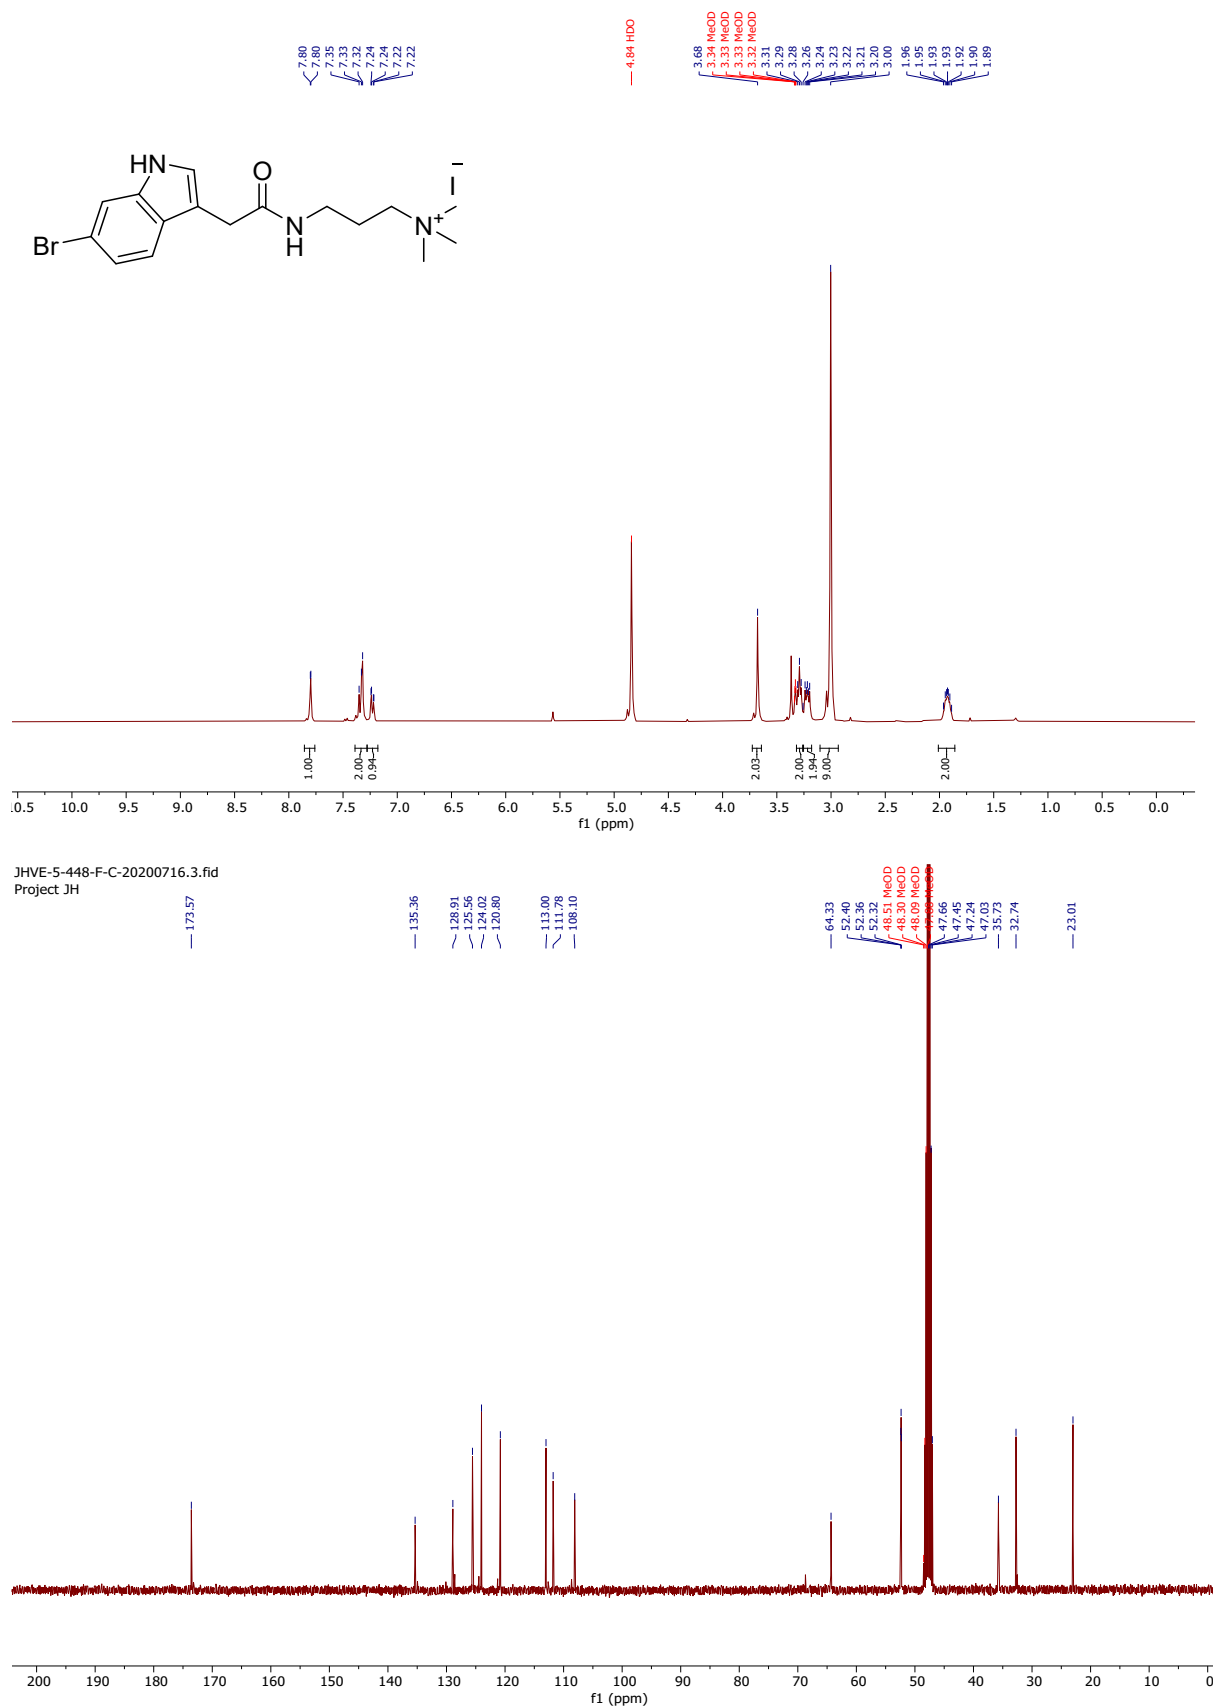



**Figure S24.** COSY and HSQC spectrum of **10a** in Methanol- $d_4$ 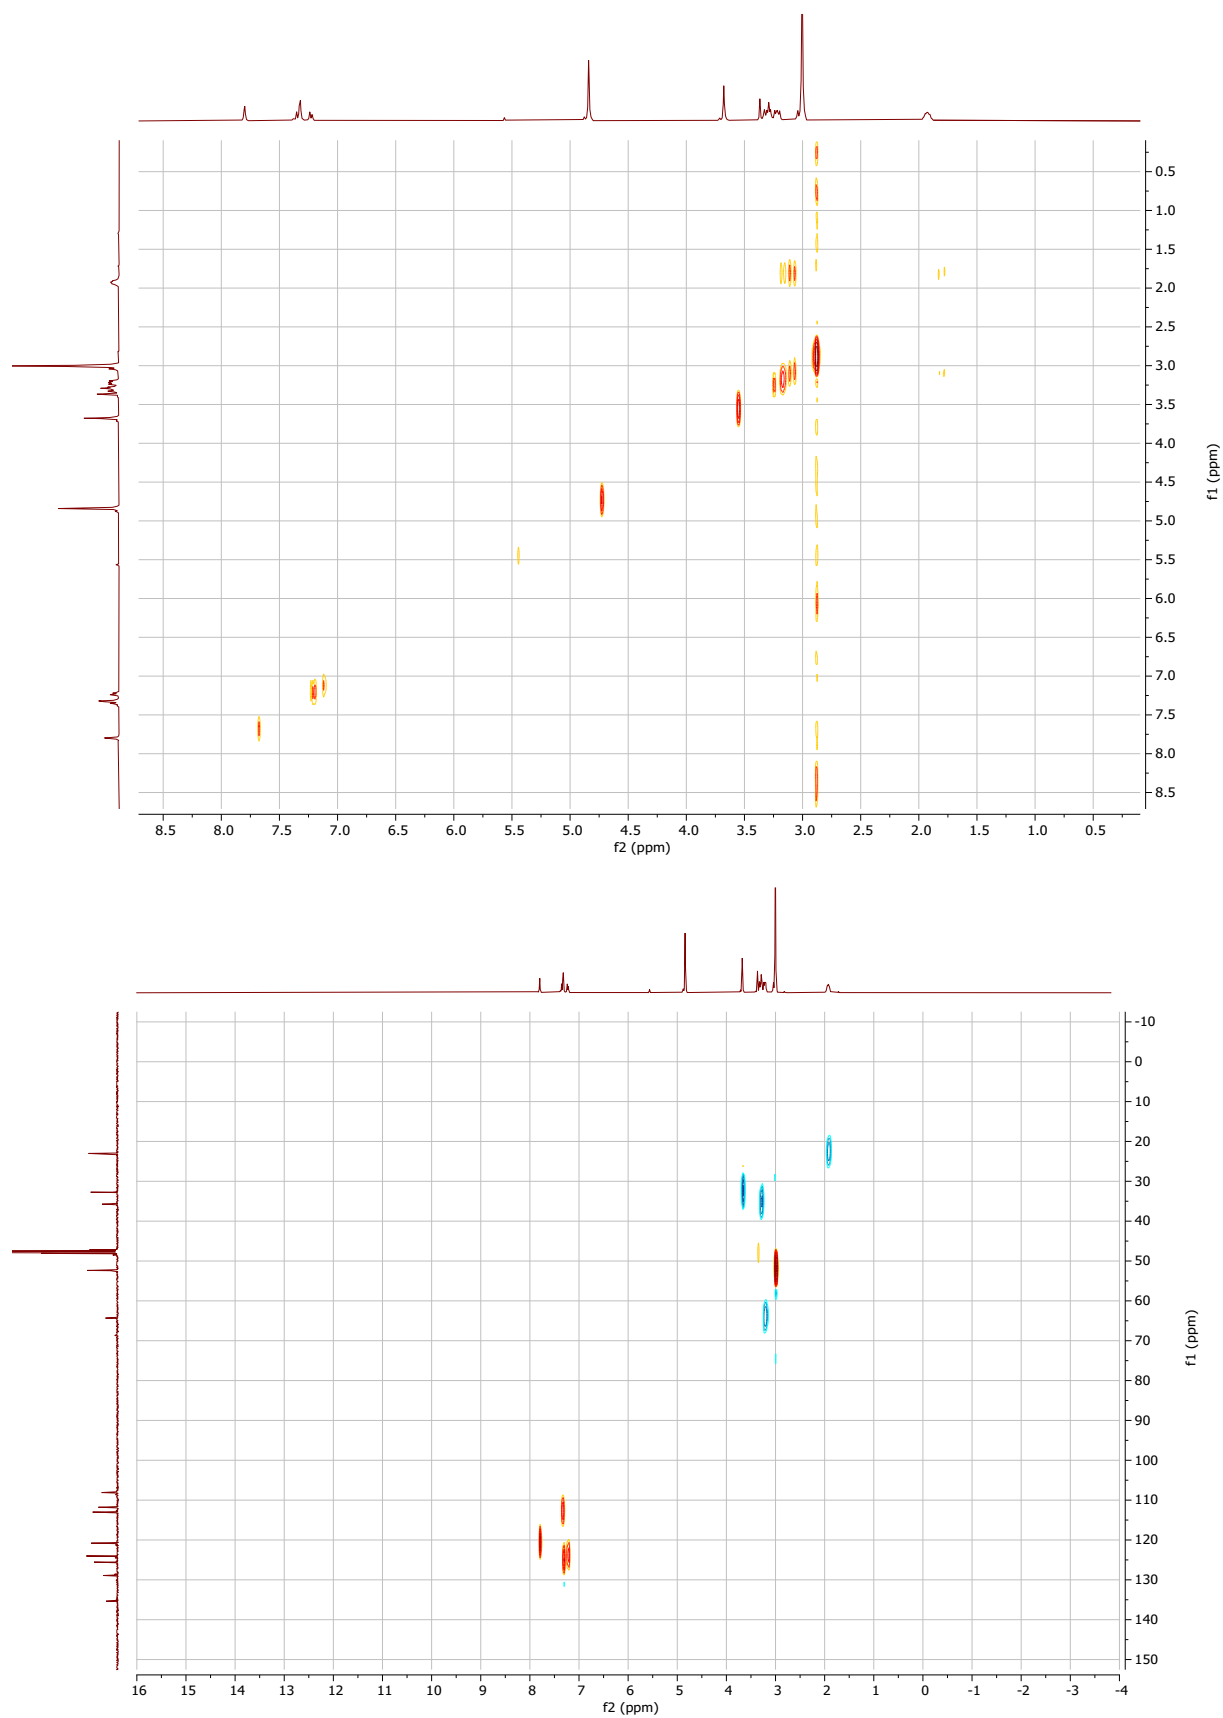

**Figure S25.** HMBC spectrum of **10a** in Methanol-*d*<sub>4</sub>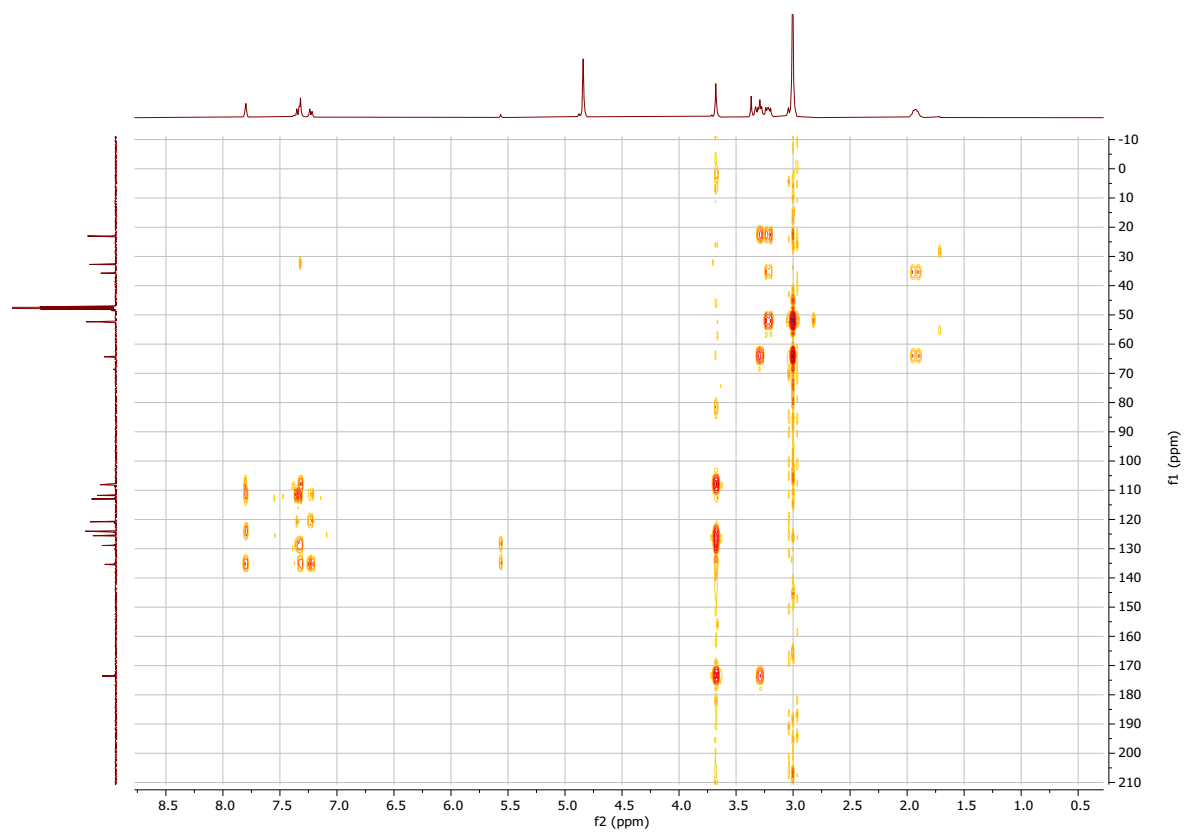

**Figure S26.**  $^1\text{H-NMR}$  and  $^{13}\text{C-NMR}$  spectrum of **10b intermediate** in Methanol- $d_4$

JHVE-6-632-STEP-1-N-diMe-20210617.1.fid  
Project JH

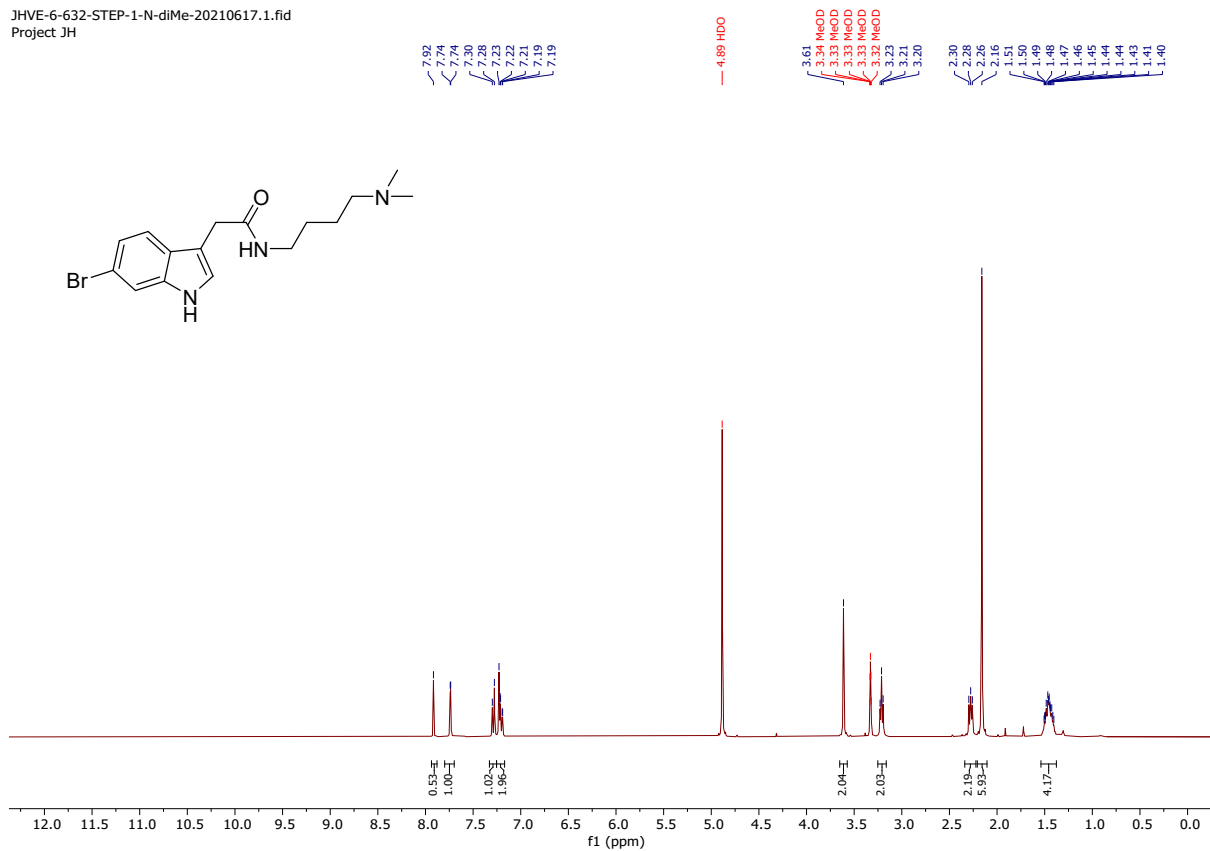

JHVE-6-632-STEP-1-N-diMe-20210617.3.fid  
Project JH

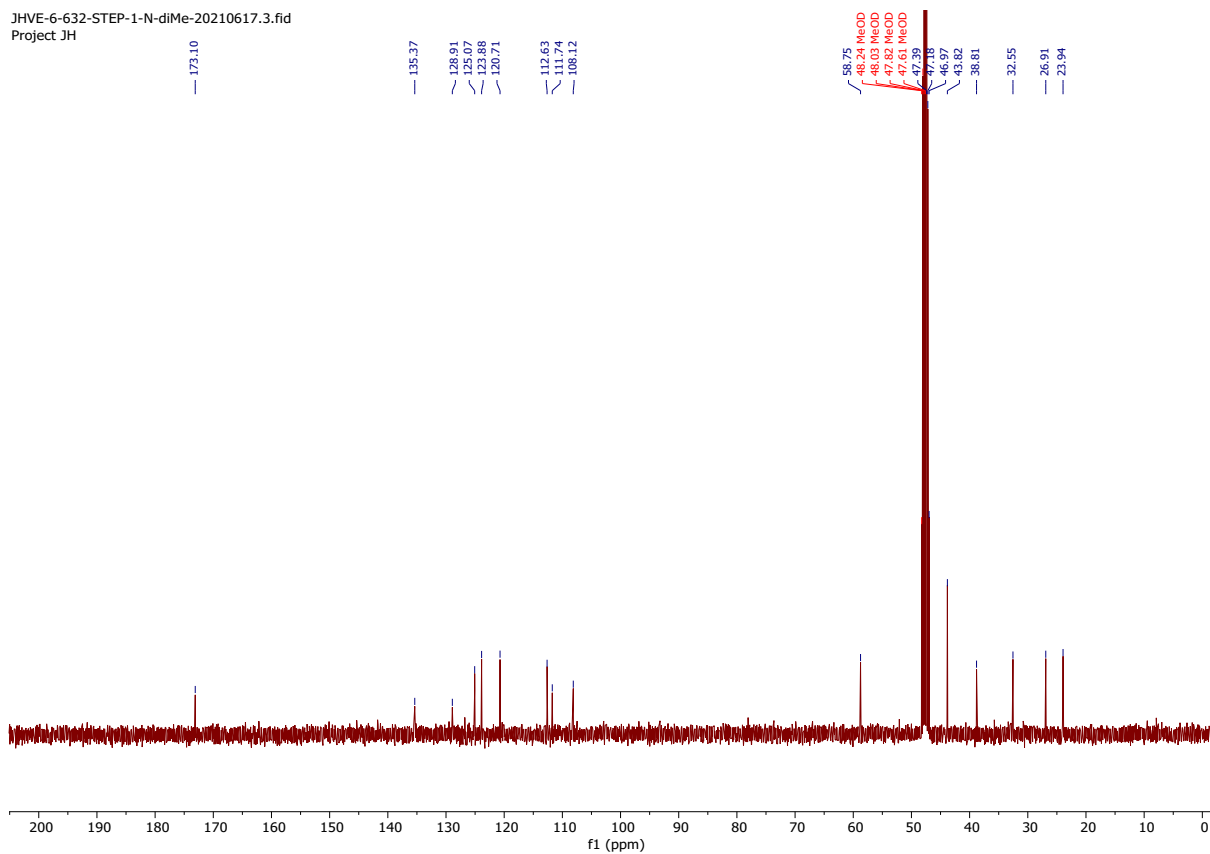

**Figure S27.**  $^1\text{H-NMR}$  and  $^{13}\text{C-NMR}$  spectrum of **10b** in Methanol- $d_4$ JHVE-6-632-Step-2-Trimethyl-20210617.1.fid  
Project JH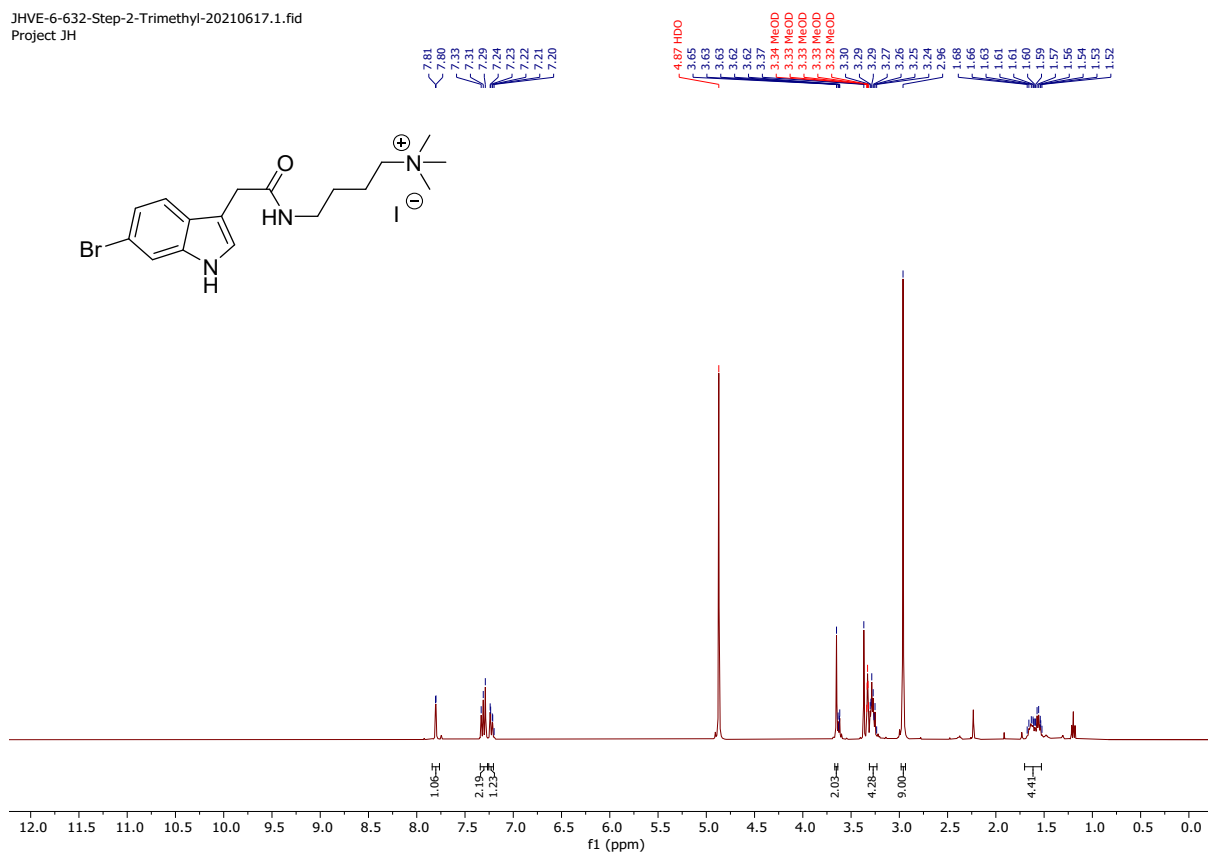JHVE-6-632-Step-2-Trimethyl-20210617.3.fid  
Project JH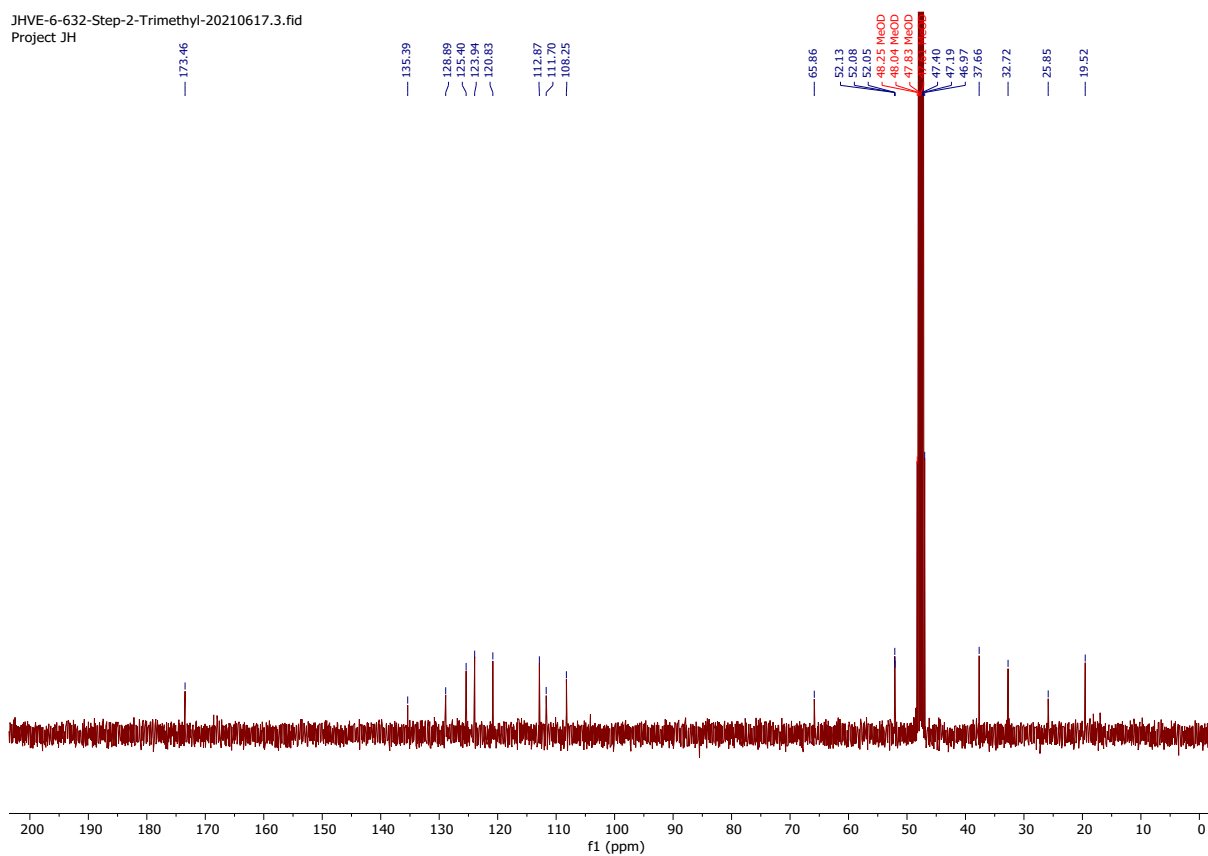

**Figure S28.**  $^1\text{H-NMR}$  and  $^{13}\text{C-NMR}$  spectrum of **10c intermediate** in Methanol- $d_4$ 

JHVE-6-633-Step-1-N-DiMe-20210617.1.fid  
Project JH

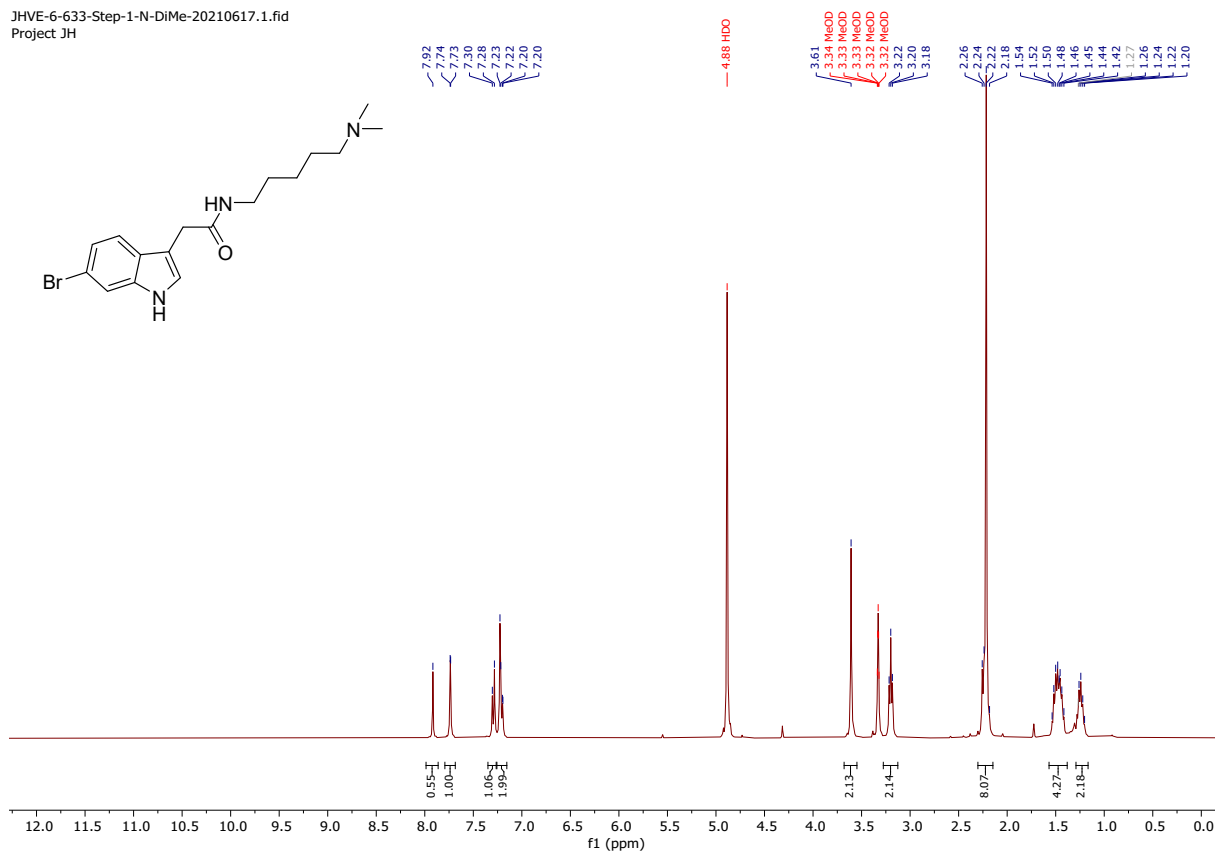

JHVE-6-633-Step-1-N-DiMe-20210617.3.fid  
Project JH

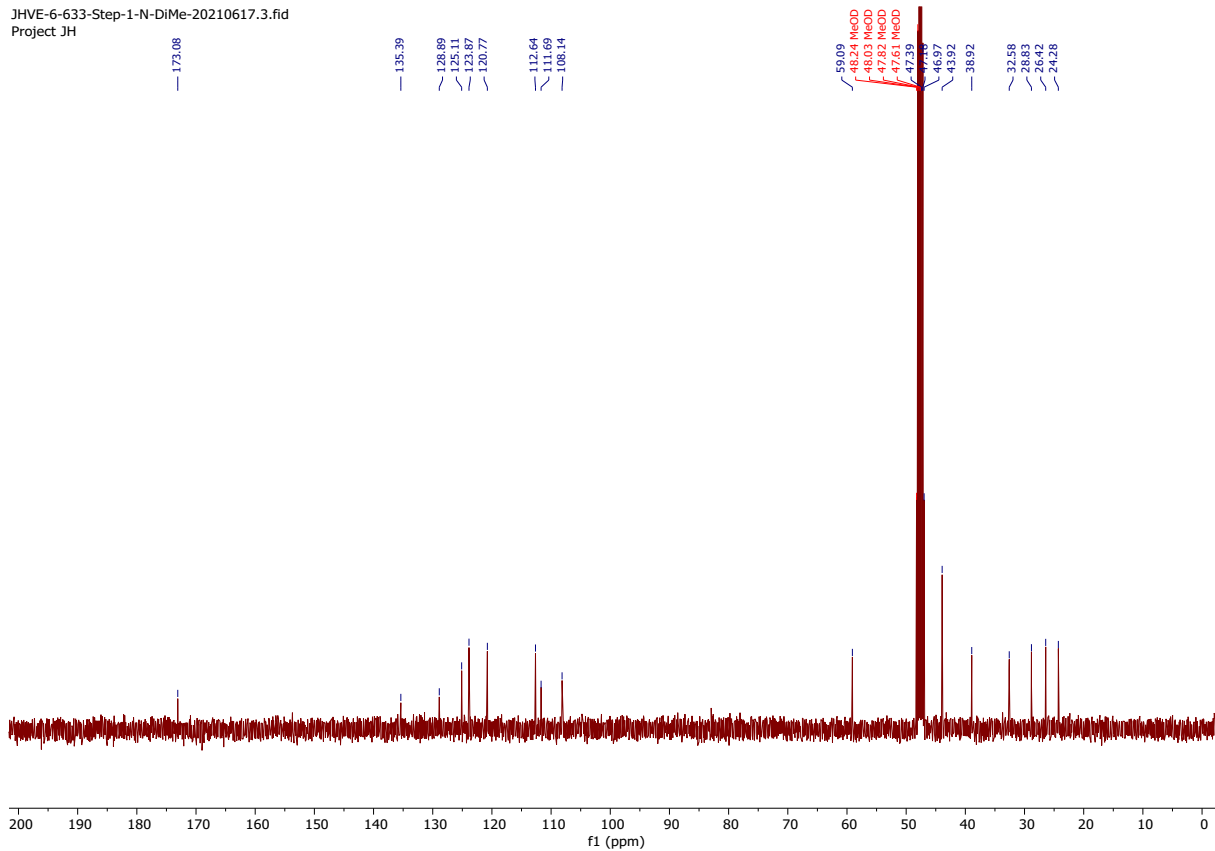

**Figure S29.**  $^1\text{H-NMR}$  and  $^{13}\text{C-NMR}$  spectrum of **10c** in Methanol- $d_4$

JHVE-6-633-STEP-2-N-trimethyl-20210617.1.fid  
Project JH

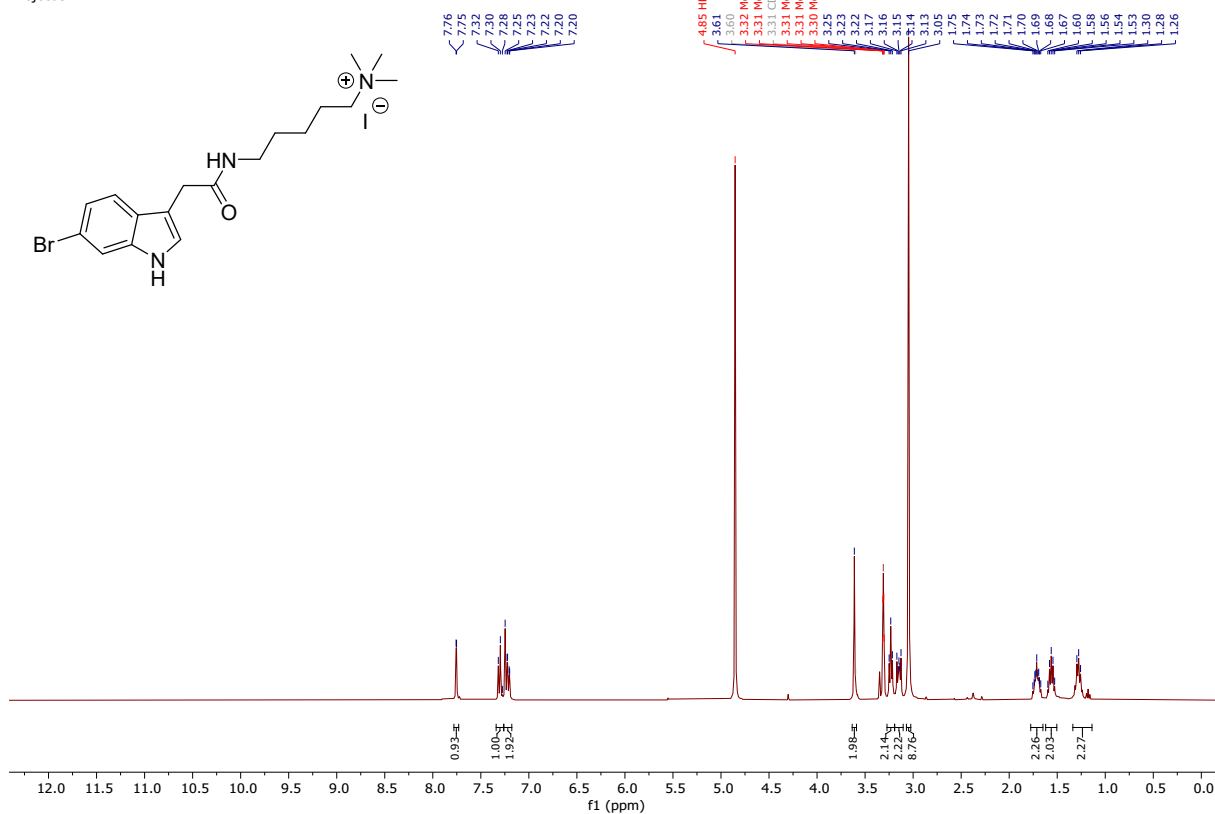

JHVE-6-633-STEP-2-N-trimethyl-20210617.8.fid  
Project JH

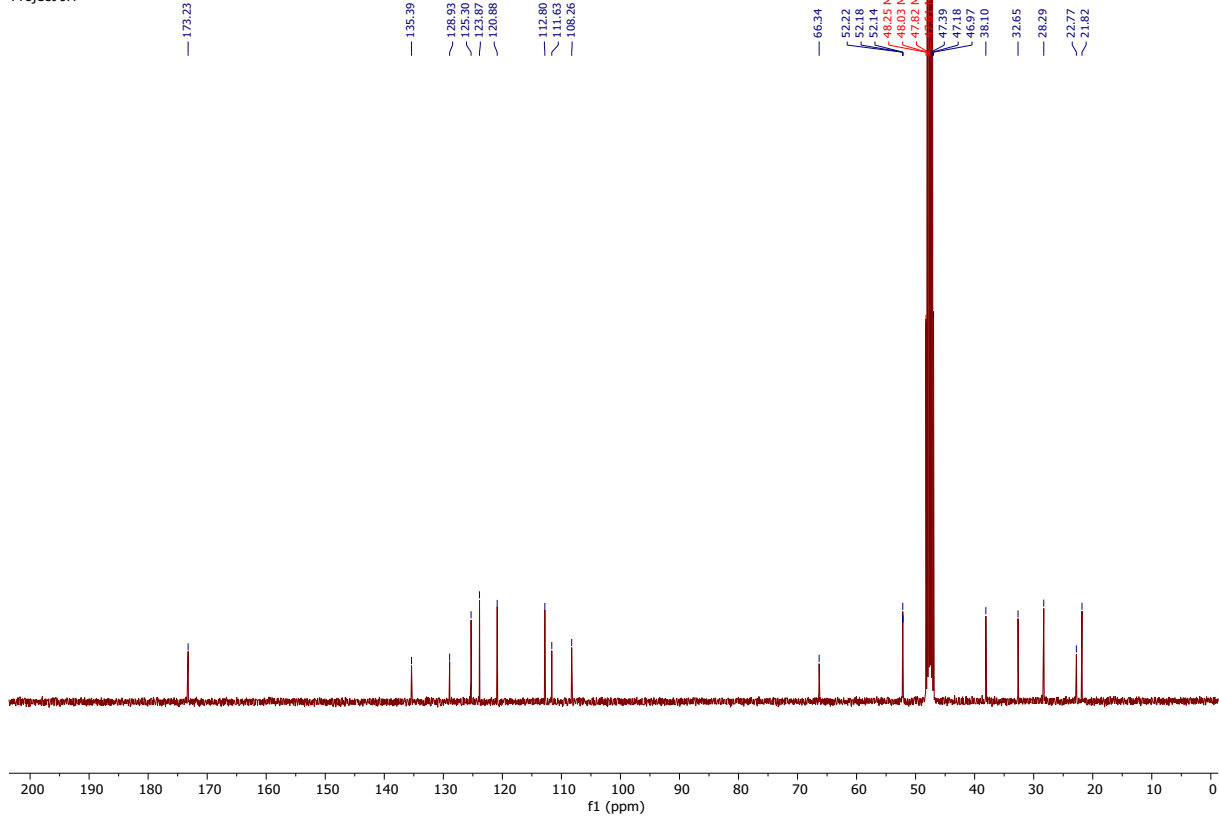

**Figure S30.**  $^1\text{H-NMR}$  and  $^{13}\text{C-NMR}$  spectrum of **10d intermediate** in Methanol- $d_4$

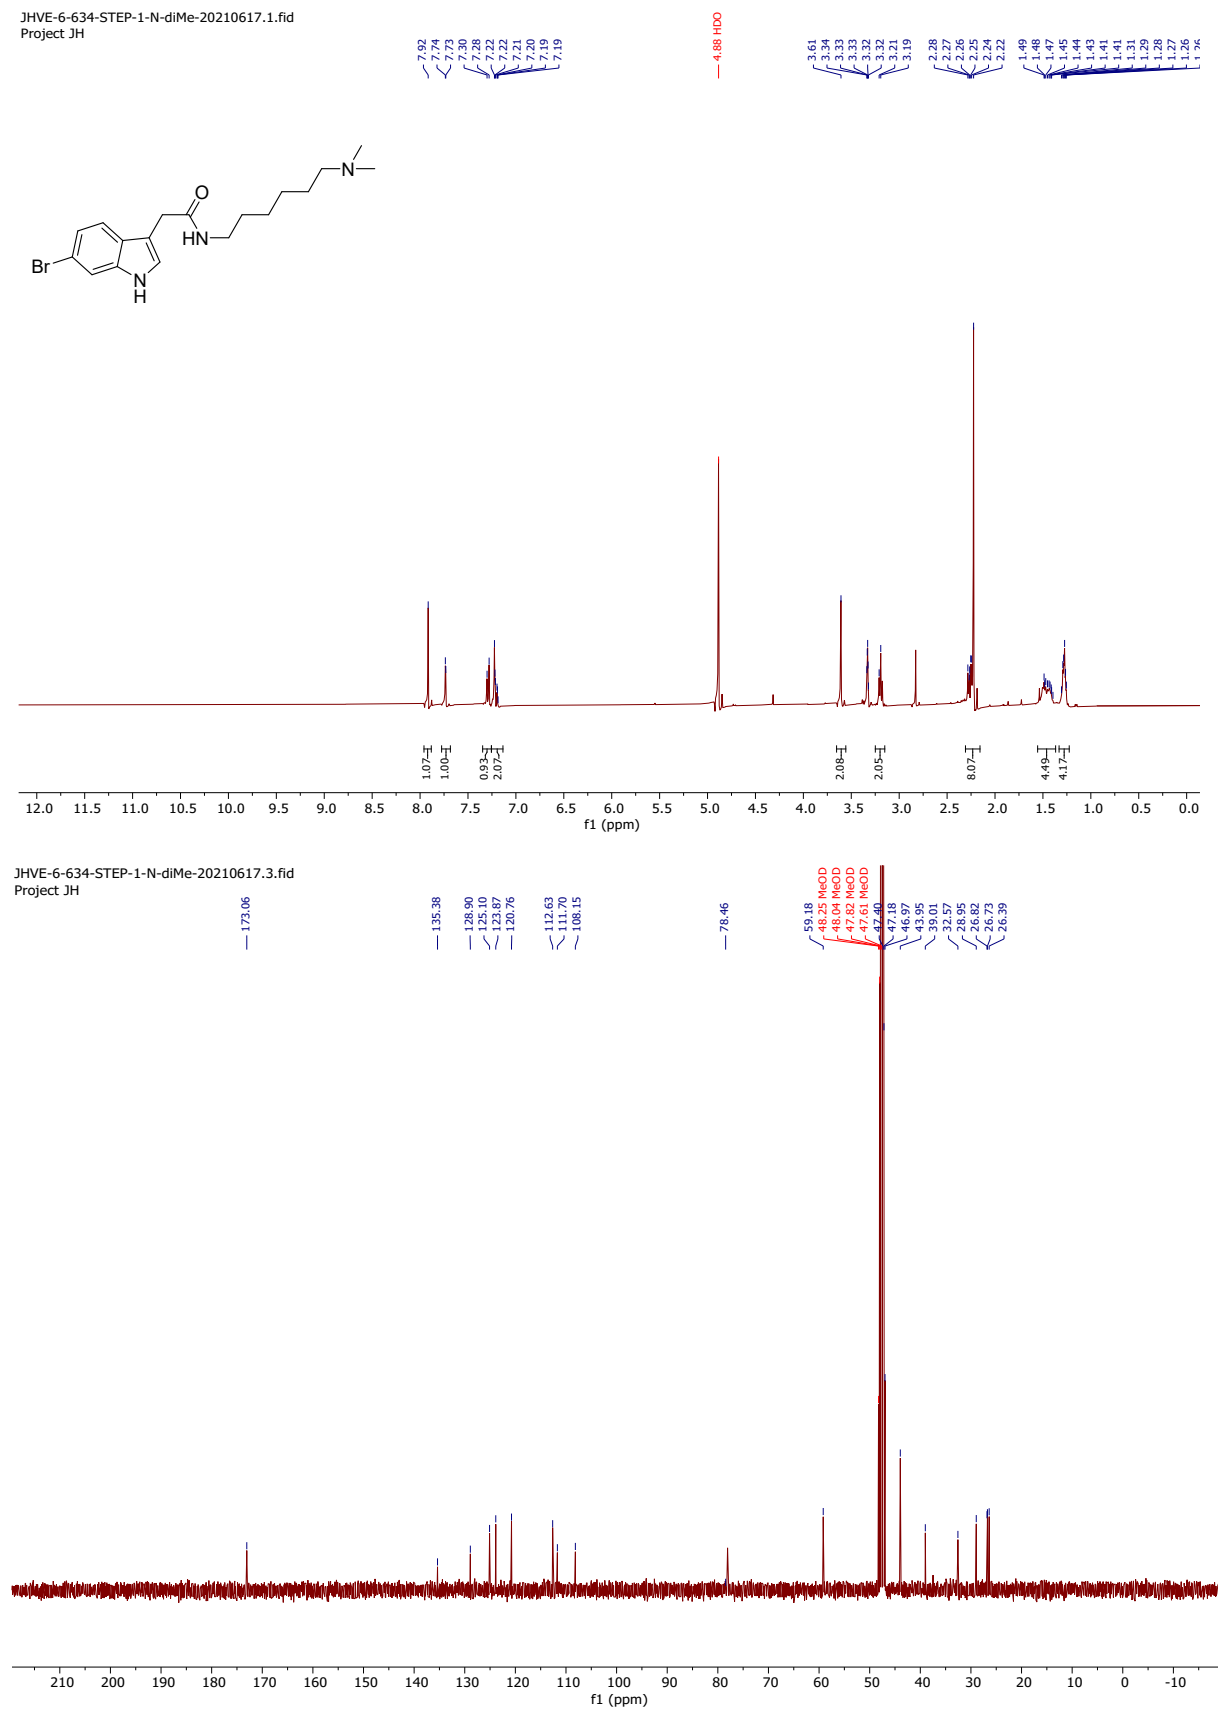

**Figure S31.**  $^1\text{H-NMR}$  and  $^{13}\text{C-NMR}$  spectrum of **10d** in Methanol- $d_4$ 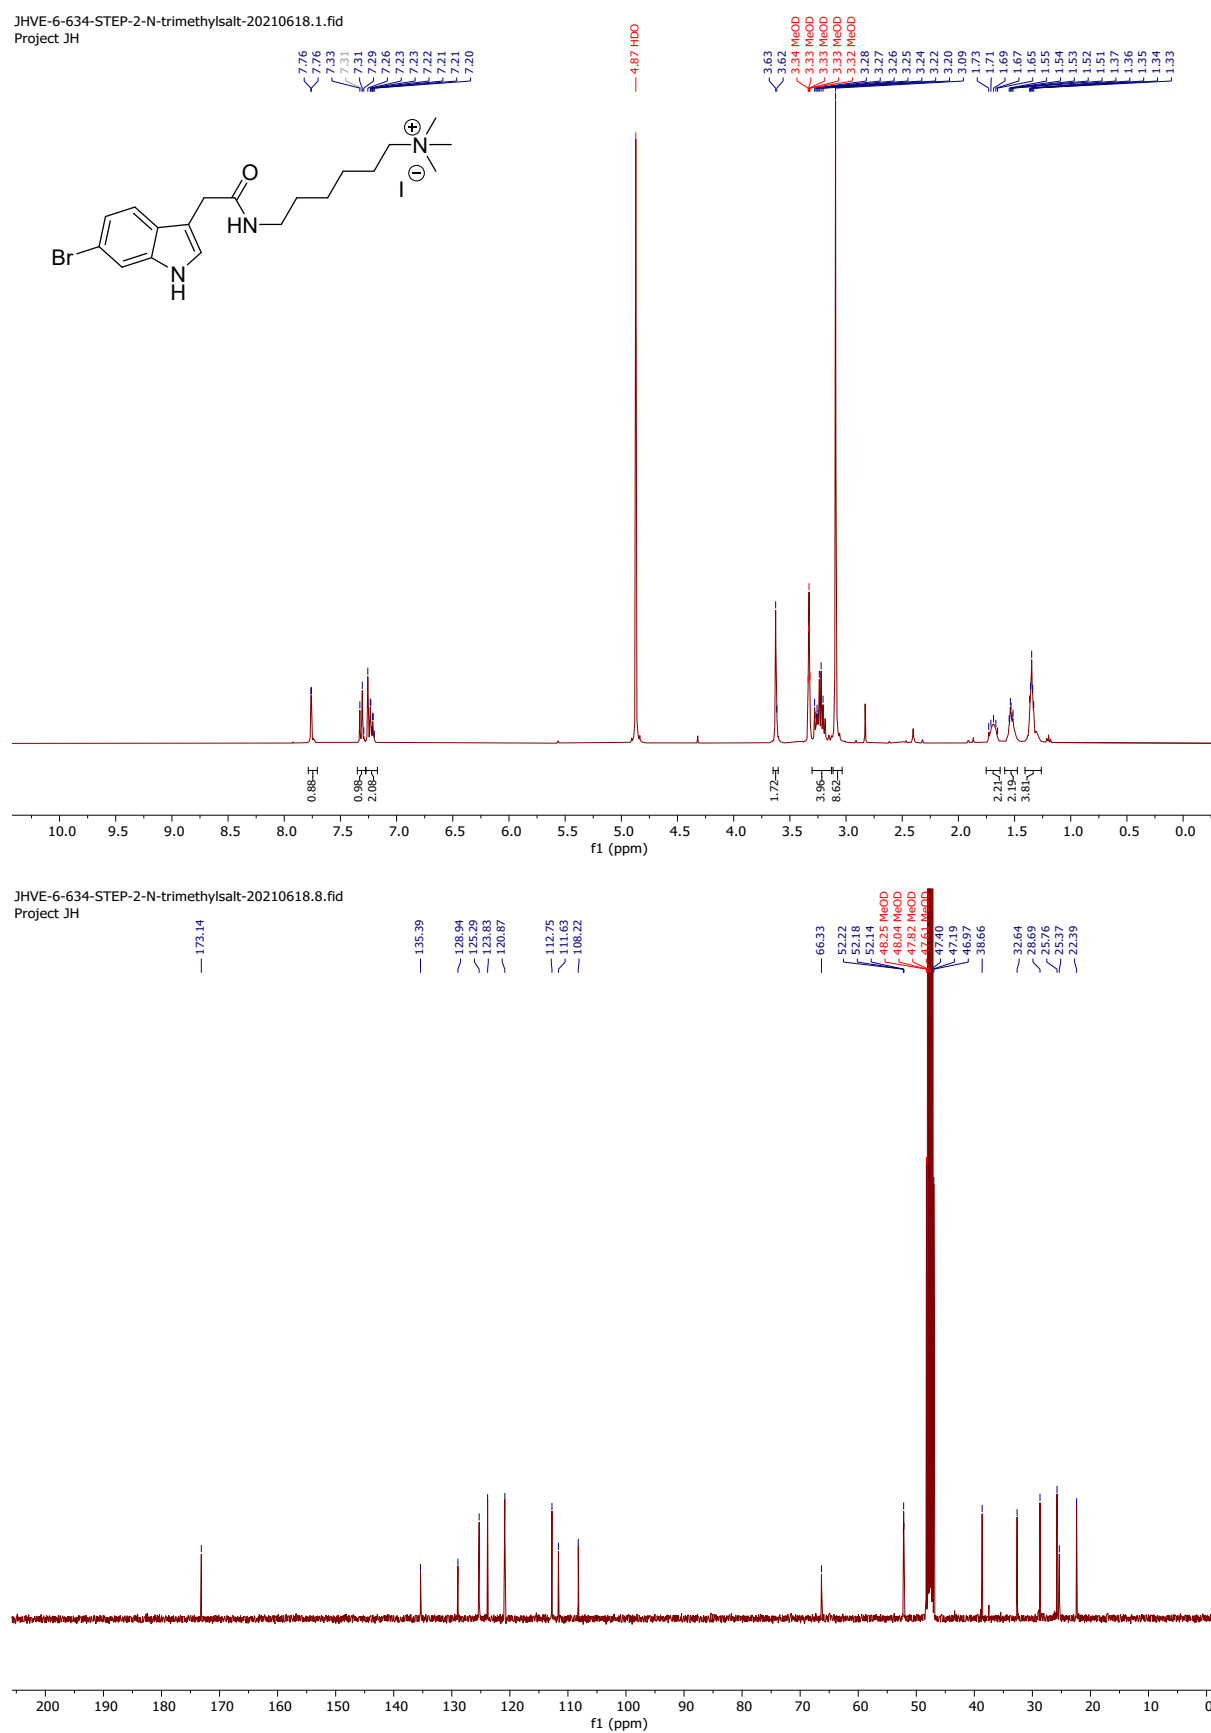

Supplement: d2ob01064j1.pdf [file d2ob01064j1.pdf]
